# Supplementary material for: Development of a Universal Correction Algorithm for Filter-Based Absorption Photometers
Source: Copernicus journal article supplement (doi:10.5194/amt-2019-336), 2019-11-04
Supplement: Supplementary file 1 [file Algo_Li_et_al_2019.docx]

#pragma TextEncoding = "UTF-8"

#pragma rtGlobals=3 // Use modern global access method and strict wave access.

///////////////////////////////////////////////////////////////////////////////////////////////

// Development of a Universal Correction Algorithm for Filter-Based Absorption Photometers//

// Igor Pro code for the algorithms (A,B,C) //

///////////////////////////////////////////////////////////////////////////////////////////////

// Code by: Hanyang Li, li.4860@osu.edu //

//////////////////////////////////////////////////////////////////////////////////////////////

//load the data

LoadWave /A/Q/O/J/D/W/K=0 "C:Users:Hanyang:Desktop:FIREX_CLAP.csv"

//=====================================list of variables used in the code===================//

//reference absorption coefficient (e.g., from a Photoacoustic Extinctiometer): babs_red_ref, babs_green_ref, babs_blue_ref

//scattering coefficient (e.g., from a Nephelometer): bscat_red, bscat_green, bscat_blue

//attenuation coefficient measured by the Filter-Based Absorption Photometer: batn_red, batn_green, batn_blue

//transmission measured by the Filter-Based Absorption Photometer: Tr_red, Tr_green, Tr_blue

//========================================================================================//

function Algo_Li_et_al_2019()

if (exists("babs_red_ref")==1 && exists("babs_green_ref")==1 && exists("babs_blue_ref")==1) // reference absorption coefficient exists

if (exists("bscat_red")==1 && exists("bscat_green")==1 && exists("bscat_blue")==1) // scattering coefficient exists

print "Implement Algorithm A"

Algo_A()

else

// scattering coefficient does not exist

print "The scenario is not considered in the manuscript. We recommend using the photoacoustic Babs."

endif

else // reference absorption coefficient does not exist

if (exists("bscat_red")==1 && exists("bscat_green")==1 && exists("bscat_blue")==1) // scattering coefficient exists

print "Implement Algorithm B"

Algo_B()

else

// scattering coefficient does not exist

print "Implement Algorithm C"

Algo_C()

endif

endif

end

function Algo_A()

wave babs_red_ref,babs_green_ref,babs_blue_ref,bscat_red,bscat_green,bscat_blue,batn_red,batn_green,batn_blue,Tr_red,Tr_green,Tr_blue

variable npnts=numpnts(batn_red)

//initialize AAE, using batn

AAE_power_fit(batn_red,batn_green,batn_blue)

wave AAE_three_lambda

make /N=(npnts)/O AAE_temp=AAE_three_lambda //"_temp" means that the term is a temporary variable, which is updated in the following loop

//initialize SSA, using batn and bscat_ref

make /N=(npnts)/O SSA_red_temp=bscat_red/(bscat_red+batn_red)

make /N=(npnts)/O SSA_green_temp=bscat_green/(bscat_green+batn_green)

make /N=(npnts)/O SSA_blue_temp=bscat_blue/(bscat_blue+batn_blue)

//initialize set of coefficients

make/N=8/O W_coef_temp_red = {0,0,0,0,0,0,0,0}

make/N=8/O W_coef_temp_green = {0,0,0,0,0,0,0,0}

make/N=8/O W_coef_temp_blue = {0,0,0,0,0,0,0,0}

//compute "g" term in Eq. (9), where g(Tr,SSA,AAE)=babs_ref/batn

make /N=(npnts)/O g_term_red_temp=babs_red_ref/batn_red

make /N=(npnts)/O g_term_green_temp=babs_green_ref/batn_green

make /N=(npnts)/O g_term_blue_temp=babs_blue_ref/batn_blue

//compute ln_Tr

make /N=(npnts)/O ln_Tr_red=ln(Tr_red)

make /N=(npnts)/O ln_Tr_green=ln(Tr_green)

make /N=(npnts)/O ln_Tr_blue=ln(Tr_blue)

variable loop_number=0

print "////////////iterative process////////////" //show major results in the command window

do

loop_number+=1

print "Loop No.", loop_number

//temporarily save the outputs from the previous iteration

duplicate /O AAE_temp,AAE_previous_cycle

//implement "Algorithm A" on each wavelength

make/D/N=8/O W_coef=W_coef_temp_red

FuncFit/Q Algorithm_function W_coef g_term_red_temp /X={ln_Tr_red,SSA_red_temp,AAE_temp} /w=batn_red

W_coef_temp_red=W_coef

make/D/N=8/O W_coef =W_coef_temp_green

FuncFit/Q Algorithm_function W_coef g_term_green_temp /X={ln_Tr_green,SSA_green_temp,AAE_temp} /w=batn_green

W_coef_temp_green=W_coef

make/D/N=8/O W_coef =W_coef_temp_blue

FuncFit/Q Algorithm_function W_coef g_term_blue_temp /X={ln_Tr_blue,SSA_blue_temp,AAE_temp} /w=batn_blue

W_coef_temp_blue=W_coef

if (loop_number==1) //output coefficients for future uses

Concatenate /O/NP=2 {W_coef_temp_red,W_coef_temp_green,W_coef_temp_blue}, W_coef_initial_guess_all_wvl

endif

//Calculate Babs for each wavelength using Eq. (8) in the manuscript

make /N=(npnts)/O b_abs_red_temp=batn_red*(W_coef_temp_red[0]+W_coef_temp_red[1]*ln_Tr_red+W_coef_temp_red[2]*SSA_red_temp+W_coef_temp_red[3]*AAE_temp+W_coef_temp_red[4]*ln_Tr_red*SSA_red_temp+W_coef_temp_red[5]*SSA_red_temp*AAE_temp+W_coef_temp_red[6]*ln_Tr_red*AAE_temp+W_coef_temp_red[7]*ln_Tr_red*AAE_temp*SSA_red_temp)

make /N=(npnts)/O b_abs_green_temp=batn_green*(W_coef_temp_green[0]+W_coef_temp_green[1]*ln_Tr_green+W_coef_temp_green[2]*SSA_green_temp+W_coef_temp_green[3]*AAE_temp+W_coef_temp_green[4]*ln_Tr_green*SSA_green_temp+W_coef_temp_green[5]*SSA_green_temp*AAE_temp+W_coef_temp_green[6]*ln_Tr_green*AAE_temp+W_coef_temp_green[7]*ln_Tr_green*AAE_temp*SSA_green_temp)

make /N=(npnts)/O b_abs_blue_temp=batn_blue*(W_coef_temp_blue[0]+W_coef_temp_blue[1]*ln_Tr_blue+W_coef_temp_blue[2]*SSA_blue_temp+W_coef_temp_blue[3]*AAE_temp+W_coef_temp_blue[4]*ln_Tr_blue*SSA_blue_temp+W_coef_temp_blue[5]*SSA_blue_temp*AAE_temp+W_coef_temp_blue[6]*ln_Tr_blue*AAE_temp+W_coef_temp_blue[7]*ln_Tr_blue*AAE_temp*SSA_blue_temp)

//create new g_term, AAE and SSA

g_term_red_temp=b_abs_red_temp/batn_red

g_term_green_temp=b_abs_green_temp/batn_green

g_term_blue_temp=b_abs_blue_temp/batn_blue

AAE_power_fit(b_abs_red_temp,b_abs_green_temp,b_abs_blue_temp)

AAE_temp=AAE_three_lambda

SSA_red_temp=bscat_red/(bscat_red+b_abs_red_temp)

SSA_green_temp=bscat_green/(bscat_green+b_abs_green_temp)

SSA_blue_temp=bscat_blue/(bscat_blue+b_abs_blue_temp)

//check if convergence is reached (tolerance is set to be 1.5%)

CurveFit/Q/ODR=2 line AAE_temp /x=AAE_previous_cycle /D

while (W_coef[1]>1.015||W_coef[1]<0.985)

//Output final results

duplicate/O AAE_temp,AAE_final

duplicate/O SSA_red_temp,SSA_red_final

duplicate/O SSA_green_temp,SSA_green_final

duplicate/O SSA_blue_temp,SSA_blue_final

duplicate/O b_abs_red_temp,b_abs_red_final

duplicate/O b_abs_green_temp,b_abs_green_final

duplicate/O b_abs_blue_temp,b_abs_blue_final

KillWaves g_term_red_temp,g_term_green_temp,g_term_blue_temp,SSA_red_temp,SSA_green_temp,SSA_blue_temp,b_abs_red_temp,b_abs_green_temp,b_abs_blue_temp,AAE_previous_cycle

edit W_coef_initial_guess_all_wvl

end

function Algo_B()

wave bscat_red,bscat_green,bscat_blue,batn_red,batn_green,batn_blue,Tr_red,Tr_green,Tr_blue

variable npnts=numpnts(batn_red)

//initialize AAE, using batn

AAE_power_fit(batn_red,batn_green,batn_blue)

wave AAE_three_lambda

make /N=(npnts)/O AAE_temp=AAE_three_lambda //"_temp" means that the term is a temporary variable, which is updated in the following loop

//initialize SSA, using batn and bscat_ref

make /N=(npnts)/O SSA_red_temp=bscat_red/(bscat_red+batn_red)

make /N=(npnts)/O SSA_green_temp=bscat_green/(bscat_green+batn_green)

make /N=(npnts)/O SSA_blue_temp=bscat_blue/(bscat_blue+batn_blue)

//compute ln_Tr

make /N=(npnts)/O ln_Tr_red=ln(Tr_red)

make /N=(npnts)/O ln_Tr_green=ln(Tr_green)

make /N=(npnts)/O ln_Tr_blue=ln(Tr_blue)

//Initialize set of coefficients. FIREX_CLAP coefficients are used in the current code.

//Recommended initial guesses for the other combinations of

//aerosol type and filter-based absorption photometer can be found in the manuscript.

Make/D/N=8/O W_coef_temp_red= {0.27, -0.16, -0.18, -0.05, 0.18, 0.08, 0.01, 0.03}

Make/D/N=8/O W_coef_temp_green= {0.30, -0.28, -0.18, -0.07, 0.25, 0.10, 0.12, -0.17}

Make/D/N=8/O W_coef_temp_blue= {0.32, -0.38, -0.19, -0.08, 0.33, 0.12, 0.23, -0.31}

//Calculate temporary Babs for each wavelength using Eq. (8) in the manuscript

make /n=(npnts)/o b_abs_red_temp=batn_red*(W_coef_temp_red[0]+W_coef_temp_red[1]*ln_Tr_red+W_coef_temp_red[2]*SSA_red_temp+W_coef_temp_red[3]*AAE_temp+W_coef_temp_red[4]*ln_Tr_red*SSA_red_temp+W_coef_temp_red[5]*SSA_red_temp*AAE_temp+W_coef_temp_red[6]*ln_Tr_red*AAE_temp+W_coef_temp_red[7]*ln_Tr_red*AAE_temp*SSA_red_temp)

make /n=(npnts)/o b_abs_green_temp=batn_green*(W_coef_temp_green[0]+W_coef_temp_green[1]*ln_Tr_green+W_coef_temp_green[2]*SSA_green_temp+W_coef_temp_green[3]*AAE_temp+W_coef_temp_green[4]*ln_Tr_green*SSA_green_temp+W_coef_temp_green[5]*SSA_green_temp*AAE_temp+W_coef_temp_green[6]*ln_Tr_green*AAE_temp+W_coef_temp_green[7]*ln_Tr_green*AAE_temp*SSA_green_temp)

make /n=(npnts)/o b_abs_blue_temp=batn_blue*(W_coef_temp_blue[0]+W_coef_temp_blue[1]*ln_Tr_blue+W_coef_temp_blue[2]*SSA_blue_temp+W_coef_temp_blue[3]*AAE_temp+W_coef_temp_blue[4]*ln_Tr_blue*SSA_blue_temp+W_coef_temp_blue[5]*SSA_blue_temp*AAE_temp+W_coef_temp_blue[6]*ln_Tr_blue*AAE_temp+W_coef_temp_blue[7]*ln_Tr_blue*AAE_temp*SSA_blue_temp)

//compute "g" term in Eq. (9), where g(Tr,SSA,AAE)=babs_ref/batn

make /N=(npnts)/O g_term_red_temp=b_abs_red_temp/batn_red

make /N=(npnts)/O g_term_green_temp=b_abs_green_temp/batn_green

make /N=(npnts)/O g_term_blue_temp=b_abs_blue_temp/batn_blue

variable loop_number=0

print "////////////iterative process////////////" //show major results in the command window

do

loop_number+=1

print "Loop No.", loop_number

//temporarily save the outputs from the previous iteration

duplicate /O AAE_temp,AAE_previous_cycle

//implement "Algorithm A" on each wavelength

make/D/N=8/O W_coef=W_coef_temp_red

FuncFit/Q Algorithm_function W_coef g_term_red_temp /X={ln_Tr_red,SSA_red_temp,AAE_temp} /w=batn_red

W_coef_temp_red=W_coef

make/D/N=8/O W_coef =W_coef_temp_green

FuncFit/Q Algorithm_function W_coef g_term_green_temp /X={ln_Tr_green,SSA_green_temp,AAE_temp} /w=batn_green

W_coef_temp_green=W_coef

make/D/N=8/O W_coef =W_coef_temp_blue

FuncFit/Q Algorithm_function W_coef g_term_blue_temp /X={ln_Tr_blue,SSA_blue_temp,AAE_temp} /w=batn_blue

W_coef_temp_blue=W_coef

//Update Babs for each wavelength using Eq. (8) in the manuscript

b_abs_red_temp=batn_red*(W_coef_temp_red[0]+W_coef_temp_red[1]*ln_Tr_red+W_coef_temp_red[2]*SSA_red_temp+W_coef_temp_red[3]*AAE_temp+W_coef_temp_red[4]*ln_Tr_red*SSA_red_temp+W_coef_temp_red[5]*SSA_red_temp*AAE_temp+W_coef_temp_red[6]*ln_Tr_red*AAE_temp+W_coef_temp_red[7]*ln_Tr_red*AAE_temp*SSA_red_temp)

b_abs_green_temp=batn_green*(W_coef_temp_green[0]+W_coef_temp_green[1]*ln_Tr_green+W_coef_temp_green[2]*SSA_green_temp+W_coef_temp_green[3]*AAE_temp+W_coef_temp_green[4]*ln_Tr_green*SSA_green_temp+W_coef_temp_green[5]*SSA_green_temp*AAE_temp+W_coef_temp_green[6]*ln_Tr_green*AAE_temp+W_coef_temp_green[7]*ln_Tr_green*AAE_temp*SSA_green_temp)

b_abs_blue_temp=batn_blue*(W_coef_temp_blue[0]+W_coef_temp_blue[1]*ln_Tr_blue+W_coef_temp_blue[2]*SSA_blue_temp+W_coef_temp_blue[3]*AAE_temp+W_coef_temp_blue[4]*ln_Tr_blue*SSA_blue_temp+W_coef_temp_blue[5]*SSA_blue_temp*AAE_temp+W_coef_temp_blue[6]*ln_Tr_blue*AAE_temp+W_coef_temp_blue[7]*ln_Tr_blue*AAE_temp*SSA_blue_temp)

//create new g_term, AAE and SSA

g_term_red_temp=b_abs_red_temp/batn_red

g_term_green_temp=b_abs_green_temp/batn_green

g_term_blue_temp=b_abs_blue_temp/batn_blue

AAE_power_fit(b_abs_red_temp,b_abs_green_temp,b_abs_blue_temp)

AAE_temp=AAE_three_lambda

SSA_red_temp=bscat_red/(bscat_red+b_abs_red_temp)

SSA_green_temp=bscat_green/(bscat_green+b_abs_green_temp)

SSA_blue_temp=bscat_blue/(bscat_blue+b_abs_blue_temp)

//check if convergence is reached (tolerance is set to be 1.5%)

CurveFit/Q/ODR=2 line AAE_temp /x=AAE_previous_cycle /D

while (W_coef[1]>1.015||W_coef[1]<0.985)

//Output the final results

duplicate/O AAE_temp,AAE_final

duplicate/O SSA_red_temp,SSA_red_final

duplicate/O SSA_green_temp,SSA_green_final

duplicate/O SSA_blue_temp,SSA_blue_final

duplicate/O b_abs_red_temp,b_abs_red_final

duplicate/O b_abs_green_temp,b_abs_green_final

duplicate/O b_abs_blue_temp,b_abs_blue_final

KillWaves g_term_red_temp,g_term_green_temp,g_term_blue_temp,SSA_red_temp,SSA_green_temp,SSA_blue_temp,b_abs_red_temp,b_abs_green_temp,b_abs_blue_temp,AAE_previous_cycle

end

function Algo_C()

wave batn_red,batn_green,batn_blue,Tr_red,Tr_green,Tr_blue

variable npnts=numpnts(batn_red)

//initialize AAE, using batn

AAE_power_fit(batn_red,batn_green,batn_blue)

wave AAE_three_lambda

make /N=(npnts)/O AAE_temp=AAE_three_lambda //"_temp" means that the term is a temporary variable, which is updated in the following loop

//initialize SSA, using AAE-SSA relationship

variable a_652=1.19,b_652=1.49,c_652=1.84

variable a_528=1.16,b_528=1.44,c_528=1.68

variable a_467=1.13,b_467=1.41,c_467=1.59

make /n=(npnts)/o SSA_red_temp=((AAE_temp-a_652)/b_652)^(1/c_652)

make /n=(npnts)/o SSA_green_temp=((AAE_temp-a_528)/b_528)^(1/c_528)

make /n=(npnts)/o SSA_blue_temp=((AAE_temp-a_467)/b_467)^(1/c_467)

//compute bscat using SSA and Batn

make /n=(npnts)/o bscat_red=SSA_red_temp/(1-SSA_red_temp)*batn_red

make /n=(npnts)/o bscat_green=SSA_green_temp/(1-SSA_green_temp)*batn_green

make /n=(npnts)/o bscat_blue=SSA_blue_temp/(1-SSA_blue_temp)*batn_blue

//compute ln_Tr

make /N=(npnts)/O ln_Tr_red=ln(Tr_red)

make /N=(npnts)/O ln_Tr_green=ln(Tr_green)

make /N=(npnts)/O ln_Tr_blue=ln(Tr_blue)

//Initialize a set of coefficients. FIREX_CLAP coefficients are used in the current code.

//Recommended initial guesses for the other combinations of

//aerosol type and filter-based absorption photometer can be found in the manuscript.

Make/D/N=8/O W_coef_temp_red= {0.27, -0.16, -0.18, -0.05, 0.18, 0.08, 0.01, 0.03}

Make/D/N=8/O W_coef_temp_green= {0.30, -0.28, -0.18, -0.07, 0.25, 0.10, 0.12, -0.17}

Make/D/N=8/O W_coef_temp_blue= {0.32, -0.38, -0.19, -0.08, 0.33, 0.12, 0.23, -0.31}

//Calculate temporary Babs for each wavelength using Eq. (8) in the manuscript

make /n=(npnts)/o b_abs_red_temp=batn_red*(W_coef_temp_red[0]+W_coef_temp_red[1]*ln_Tr_red+W_coef_temp_red[2]*SSA_red_temp+W_coef_temp_red[3]*AAE_temp+W_coef_temp_red[4]*ln_Tr_red*SSA_red_temp+W_coef_temp_red[5]*SSA_red_temp*AAE_temp+W_coef_temp_red[6]*ln_Tr_red*AAE_temp+W_coef_temp_red[7]*ln_Tr_red*AAE_temp*SSA_red_temp)

make /n=(npnts)/o b_abs_green_temp=batn_green*(W_coef_temp_green[0]+W_coef_temp_green[1]*ln_Tr_green+W_coef_temp_green[2]*SSA_green_temp+W_coef_temp_green[3]*AAE_temp+W_coef_temp_green[4]*ln_Tr_green*SSA_green_temp+W_coef_temp_green[5]*SSA_green_temp*AAE_temp+W_coef_temp_green[6]*ln_Tr_green*AAE_temp+W_coef_temp_green[7]*ln_Tr_green*AAE_temp*SSA_green_temp)

make /n=(npnts)/o b_abs_blue_temp=batn_blue*(W_coef_temp_blue[0]+W_coef_temp_blue[1]*ln_Tr_blue+W_coef_temp_blue[2]*SSA_blue_temp+W_coef_temp_blue[3]*AAE_temp+W_coef_temp_blue[4]*ln_Tr_blue*SSA_blue_temp+W_coef_temp_blue[5]*SSA_blue_temp*AAE_temp+W_coef_temp_blue[6]*ln_Tr_blue*AAE_temp+W_coef_temp_blue[7]*ln_Tr_blue*AAE_temp*SSA_blue_temp)

//compute "g" term in Eq. (9), where g(Tr,SSA,AAE)=babs_ref/batn

make /N=(npnts)/O g_term_red_temp=b_abs_red_temp/batn_red

make /N=(npnts)/O g_term_green_temp=b_abs_green_temp/batn_green

make /N=(npnts)/O g_term_blue_temp=b_abs_blue_temp/batn_blue

variable loop_number=0

print "////////////iterative process////////////" //show major results in the command window

do

loop_number+=1

print "Loop No.", loop_number

//temporarily save the outputs from the previous iteration

duplicate /O AAE_temp,AAE_previous_cycle

//implement "Algorithm A" on each wavelength

make/D/N=8/O W_coef=W_coef_temp_red

FuncFit/Q Algorithm_function W_coef g_term_red_temp /X={ln_Tr_red,SSA_red_temp,AAE_temp} /w=batn_red

W_coef_temp_red=W_coef

make/D/N=8/O W_coef =W_coef_temp_green

FuncFit/Q Algorithm_function W_coef g_term_green_temp /X={ln_Tr_green,SSA_green_temp,AAE_temp} /w=batn_green

W_coef_temp_green=W_coef

make/D/N=8/O W_coef =W_coef_temp_blue

FuncFit/Q Algorithm_function W_coef g_term_blue_temp /X={ln_Tr_blue,SSA_blue_temp,AAE_temp} /w=batn_blue

W_coef_temp_blue=W_coef

//Update Babs for each wavelength using Eq. (8) in the manuscript

b_abs_red_temp=batn_red*(W_coef_temp_red[0]+W_coef_temp_red[1]*ln_Tr_red+W_coef_temp_red[2]*SSA_red_temp+W_coef_temp_red[3]*AAE_temp+W_coef_temp_red[4]*ln_Tr_red*SSA_red_temp+W_coef_temp_red[5]*SSA_red_temp*AAE_temp+W_coef_temp_red[6]*ln_Tr_red*AAE_temp+W_coef_temp_red[7]*ln_Tr_red*AAE_temp*SSA_red_temp)

b_abs_green_temp=batn_green*(W_coef_temp_green[0]+W_coef_temp_green[1]*ln_Tr_green+W_coef_temp_green[2]*SSA_green_temp+W_coef_temp_green[3]*AAE_temp+W_coef_temp_green[4]*ln_Tr_green*SSA_green_temp+W_coef_temp_green[5]*SSA_green_temp*AAE_temp+W_coef_temp_green[6]*ln_Tr_green*AAE_temp+W_coef_temp_green[7]*ln_Tr_green*AAE_temp*SSA_green_temp)

b_abs_blue_temp=batn_blue*(W_coef_temp_blue[0]+W_coef_temp_blue[1]*ln_Tr_blue+W_coef_temp_blue[2]*SSA_blue_temp+W_coef_temp_blue[3]*AAE_temp+W_coef_temp_blue[4]*ln_Tr_blue*SSA_blue_temp+W_coef_temp_blue[5]*SSA_blue_temp*AAE_temp+W_coef_temp_blue[6]*ln_Tr_blue*AAE_temp+W_coef_temp_blue[7]*ln_Tr_blue*AAE_temp*SSA_blue_temp)

//create new g_term, AAE and SSA

g_term_red_temp=b_abs_red_temp/batn_red

g_term_green_temp=b_abs_green_temp/batn_green

g_term_blue_temp=b_abs_blue_temp/batn_blue

AAE_power_fit(b_abs_red_temp,b_abs_green_temp,b_abs_blue_temp)

AAE_temp=AAE_three_lambda

SSA_red_temp=bscat_red/(bscat_red+b_abs_red_temp)

SSA_green_temp=bscat_green/(bscat_green+b_abs_green_temp)

SSA_blue_temp=bscat_blue/(bscat_blue+b_abs_blue_temp)

//check if convergence is reached (tolerance is set to be 1.5%)

CurveFit/Q/ODR=2 line AAE_temp /x=AAE_previous_cycle /D

while (W_coef[1]>1.015||W_coef[1]<0.985)

//Output the final results

duplicate/O AAE_temp,AAE_final

duplicate/O SSA_red_temp,SSA_red_final

duplicate/O SSA_green_temp,SSA_green_final

duplicate/O SSA_blue_temp,SSA_blue_final

duplicate/O b_abs_red_temp,b_abs_red_final

duplicate/O b_abs_green_temp,b_abs_green_final

duplicate/O b_abs_blue_temp,b_abs_blue_final

KillWaves g_term_red_temp,g_term_green_temp,g_term_blue_temp,SSA_red_temp,SSA_green_temp,SSA_blue_temp,b_abs_red_temp,b_abs_green_temp,b_abs_blue_temp,AAE_previous_cycle

end

function AAE_power_fit(babs_wvl_red,babs_wvl_green,babs_wvl_blue)

wave babs_wvl_red,babs_wvl_green,babs_wvl_blue

//the operated wavelengths are specified by the manufacture

make /O/N=3 wavelength_instrument={652,528,467}

variable npnts=numpnts(babs_wvl_red)

//compute AAE_two_lambda, which are used later when initializing AAE_three_lambda

make /N=(npnts)/O AAE_R_G=-ln(babs_wvl_red/babs_wvl_green)/ln(wavelength_instrument[0]/wavelength_instrument[1])

make /N=(npnts)/O AAE_R_B=-ln(babs_wvl_red/babs_wvl_blue)/ln(wavelength_instrument[0]/wavelength_instrument[2])

make /N=(npnts)/O AAE_G_B=-ln(babs_wvl_green/babs_wvl_blue)/ln(wavelength_instrument[1]/wavelength_instrument[2])

make /N=(npnts)/O AAE_three_lambda=nan

//initialize coefficients in babs-AAE function

variable temp_AAE,temp_AAE_constant,temp_sigma,temp_sigma_constant

variable m

for (m=0;m<(npnts);m+=1)

if (numtype(babs_wvl_red[m])==0&&numtype(babs_wvl_green[m])==0&&numtype(babs_wvl_blue[m])==0)

make /O /N=3 one_babs_at_three_lambda={babs_wvl_red[m],babs_wvl_green[m],babs_wvl_blue[m]}

////use AAE_G_B as initial input

make/D/N=2/O W_coef = {AAE_G_B[m],babs_wvl_green[m]/ (528^(-AAE_G_B[m])) }

FuncFit/Q AAE_fit_one_measurement W_coef one_babs_at_three_lambda /X=wavelength_instrument /D

wave W_coef,w_sigma

temp_AAE=W_coef[0];temp_AAE_constant=W_coef[1];temp_sigma=w_sigma[0];temp_sigma_constant=w_sigma[1]

////use AAE_R_G as initial input

make/D/N=2/O W_coef = {AAE_R_G[m],babs_wvl_red[m]/ (652^(-AAE_R_G[m])) }

FuncFit/Q AAE_fit_one_measurement W_coef one_babs_at_three_lambda /X=wavelength_instrument /D

//check if the current inital guess (AAE_R_G) is better than the previous one (AAE_G_B): ? w_sigma is smaller

if (w_sigma[0]<temp_sigma) //Yes, the current w_sigma is smaller

temp_AAE=W_coef[0];temp_AAE_constant=W_coef[1];temp_sigma=w_sigma[0];temp_sigma_constant=w_sigma[1]

else

//do not replace the previous results

endif

////use AAE_R_B as initial input

make/D/N=2/O W_coef = {AAE_R_B[m],babs_wvl_blue[m]/ (467^(-AAE_R_B[m])) }

FuncFit/Q AAE_fit_one_measurement W_coef one_babs_at_three_lambda /X=wavelength_instrument /D

//check if the current initial guess (AAE_R_B) is better than the previous one (AAE_G_B or AAE_R_G): ? w_sigma is smaller

if (w_sigma[0]<temp_sigma) //Yes, the current w_sigma is smaller

temp_AAE=W_coef[0];temp_AAE_constant=W_coef[1];temp_sigma=w_sigma[0];temp_sigma_constant=w_sigma[1]

else

//do not replace the previous results

endif

//Output the results

AAE_three_lambda[m]=temp_AAE

temp_AAE=nan;temp_AAE_constant=nan;temp_AAE=nan;temp_sigma=nan

endif

endfor

end

Function AAE_fit_one_measurement(w,wavelength) : FitFunc

Wave w

Variable wavelength

//CurveFitDialog/ These comments were created by the Curve Fitting dialog. Altering them will

//CurveFitDialog/ make the function less convenient to work with in the Curve Fitting dialog.

//CurveFitDialog/ Equation:

//CurveFitDialog/ f(wavelength) = AAE_constant*wavelength^(-AAE_cal)

//CurveFitDialog/ End of Equation

//CurveFitDialog/ Independent Variables 1

//CurveFitDialog/ wavelength

//CurveFitDialog/ Coefficients 2

//CurveFitDialog/ w[0] = AAE_cal

//CurveFitDialog/ w[1] = AAE_constant

return w[1]*wavelength^(-w[0])

End

Function Algorithm_function(w,ln_tr_in_function,SSA_in_function, AAE_in_function) : FitFunc

Wave w

Variable ln_tr_in_function

Variable SSA_in_function

Variable AAE_in_function

//CurveFitDialog/ These comments were created by the Curve Fitting dialog. Altering them will

//CurveFitDialog/ make the function less convenient to work with in the Curve Fitting dialog.

//CurveFitDialog/ Equation:

//CurveFitDialog/ f(ln_tr_in_function,SSA_in_function,aae_in_function) = c0+c1*ln_tr_in_function+c2*SSA_in_function+c3*aae_in_function+c4*ln_tr_in_function*SSA_in_function+c5*SSA_in_function*aae_in_function+c6*ln_tr_in_function*aae_in_function+c7*ln_tr_in_function*aae_in_function*SSA_in_function

//CurveFitDialog/ End of Equation

//CurveFitDialog/ Independent Variables 3

//CurveFitDialog/ SSA_in_function

//CurveFitDialog/ aae_in_function

//CurveFitDialog/ ln_tr_in_function

//CurveFitDialog/ Coefficients 8

//CurveFitDialog/ w[0] = c0

//CurveFitDialog/ w[1] = c1

//CurveFitDialog/ w[2] = c2

//CurveFitDialog/ w[3] = c3

//CurveFitDialog/ w[4] = c4

//CurveFitDialog/ w[5] = c5

//CurveFitDialog/ w[6] = C6

//CurveFitDialog/ w[7] = C7

return w[0]+w[1]*ln_tr_in_function+w[2]*SSA_in_function+w[3]*aae_in_function+w[4]*ln_tr_in_function*SSA_in_function+w[5]*SSA_in_function*aae_in_function+w[6]*ln_tr_in_function*aae_in_function+W[7]*ln_tr_in_function*aae_in_function*SSA_in_function

End

Function Decimal_control(value, numSigDigits)

variable value, numSigDigits

string str

sprintf str, "%.*g\r", numSigDigits, value

return str2num(str)

End
