# Supplementary material for: Development of a Universal Correction Algorithm for Filter-Based Absorption Photometers
Source: Copernicus journal article supplement (doi:10.5194/amt-2019-336), 2019-11-04
Supplement: Supplementary file 1 [file SI_Development of a Universal Correction Algorithm for Filter-Based Absorption Photometers.pdf › SI_Development of a Universal Correction Algorithm for Filter-Based Absorption Photometers.pdf]

# Development of a Universal Correction Algorithm for Filter-Based Absorption Photometers

Hanyang Li<sup>1</sup>, Gavin R. McMeeking<sup>2</sup>, and Andrew A. May<sup>1</sup>

1 The Ohio State University Department of Civil, Environmental, and Geodetic Engineering, Columbus, Ohio, USA

2 Handix Scientific, LLC, Boulder, Colorado, USA

*Corresponding author:* Andrew A. May ([may.561@osu.edu](mailto:may.561@osu.edu)).

This Word document includes:

- Supplementary Text (Pages 2-7)
  1. Developing the model described in Section 2.3.3
    - Prediction of  $\frac{B_{abs}}{B_{ATN}}$  using multiple regression models
    - Transformation of the regression models
    - Assessment of the fit of regression models
    - Interpretation of the regression models
  2. The procedure for simulating the uncertainty of the new algorithms in Section 3.5
- Tables S5 to S12 (Pages 8-13)
  - **S5.** Relationship between the corrected filter-based  $B_{abs}$  (FIREX-TAP and SGP-PSAP) and the reference  $B_{abs}$ .
  - **S6.** Inter-comparison between different filter-based  $B_{abs}$  corrected by the same algorithm.
  - **S7-S11.** Updated coefficients in the B1999 and V2005 algorithms using our data.
  - **S12.** The quartile deviation of the derived coefficient values in our algorithm.
- Figures S5 to S13 (Pages 14-19)
  - **S5.** Relationship between the corrected filter-based  $B_{abs}$  (FIREX-TAP and SGP-PSAP) and the reference  $B_{abs}$ .
  - **S6.** Relationship between the corrected FIREX-AETH and the reference  $B_{abs}$ .
  - **S7.** The distribution of derived coefficient values in our algorithm.
  - **S8.** Inter-comparison between the SGP-CLAP  $B_{abs}$  corrected by “Algorithm C” and reference  $B_{abs}$ .
  - **S9-S10.** The distribution of SSA calculated by different combinations of  $B_{abs}$  and  $B_{scat}$ .
  - **S11.** The distribution of AAE and SSA computed by the new algorithms (A, B, C)
  - **S12.** The distribution of AAE calculated by different wavelength combinations.
  - **S13.** Inter-comparison of SGP-CLAP  $B_{abs}$  derived by the new algorithm with different calculation of AAE.
- References (Page 20)

## SUPPLEMENTARY TEXT

### 1. Developing the model described in Section 2.3.3

Statistical regression analyses were performed to predict  $\frac{B_{abs}}{B_{ATN}}$  (dependent variable) in Eq. (9). The analyses were applied on a total of 2676 FIREX observations (PAX-derived  $B_{abs}$ , CLAP-derived  $B_{ATN}$ , Tr, SSA, and AAE) at three wavelengths (467 nm, 528 nm, and 652 nm). Table S1 summarizes the variables used in the analyses. The statistical software R was used for all analyses.

**Table S1** Descriptive statistics for the variables under consideration as inputs to the correction algorithm.

|         | $B_{abs}$ |        |        | $B_{ATN}$ |        |        | $B_{abs} \setminus B_{ATN}$ |        |        | Tr     |        |        | SSA    |        |        | AAE  |
|---------|-----------|--------|--------|-----------|--------|--------|-----------------------------|--------|--------|--------|--------|--------|--------|--------|--------|------|
|         | 467 nm    | 528 nm | 652 nm | 467 nm    | 528 nm | 652 nm | 467 nm                      | 528 nm | 652 nm | 467 nm | 528 nm | 652 nm | 467 nm | 528 nm | 652 nm |      |
| Min.    | 45.0      | 38.5   | 29.5   | 162.0     | 140.1  | 98.9   | 0.14                        | 0.12   | 0.10   | 0.27   | 0.34   | 0.45   | 0.27   | 0.25   | 0.21   | 1.25 |
| 1st Qu. | 125.4     | 99.9   | 64.8   | 473.7     | 413.3  | 296.5  | 0.22                        | 0.20   | 0.18   | 0.55   | 0.60   | 0.70   | 0.50   | 0.47   | 0.44   | 1.52 |
| Median  | 216.5     | 169.5  | 112.1  | 843.9     | 721.8  | 528.5  | 0.25                        | 0.23   | 0.21   | 0.66   | 0.71   | 0.79   | 0.72   | 0.72   | 0.70   | 1.72 |
| Mean    | 320.2     | 245.9  | 160.2  | 1276.7    | 1091.0 | 781.6  | 0.26                        | 0.24   | 0.22   | 0.68   | 0.72   | 0.79   | 0.66   | 0.66   | 0.65   | 1.99 |
| 3rd Qu. | 407.5     | 316.2  | 203.7  | 1658.2    | 1418.6 | 1000.9 | 0.30                        | 0.27   | 0.25   | 0.80   | 0.83   | 0.88   | 0.84   | 0.84   | 0.84   | 2.34 |
| Max.    | 2370.9    | 1689.2 | 1295.8 | 11227.0   | 9280.7 | 6391.2 | 0.45                        | 0.43   | 0.40   | 1.00   | 1.00   | 1.00   | 0.95   | 0.96   | 0.97   | 4.07 |

Figure S1 shows the relationships between  $\frac{B_{abs}}{B_{ATN}}$  and each independent variable. It is clear that  $\frac{B_{abs}}{B_{ATN}}$  increases with decreasing Tr, SSA, and AAE. However, the relationships are nonlinear, and the data points scatter fairly widely. Moreover,  $\frac{B_{abs}}{B_{ATN}}$  spans a wide range of values at a single value of Tr, which inspired us to investigate the interactions among Tr, SSA, and AAE.

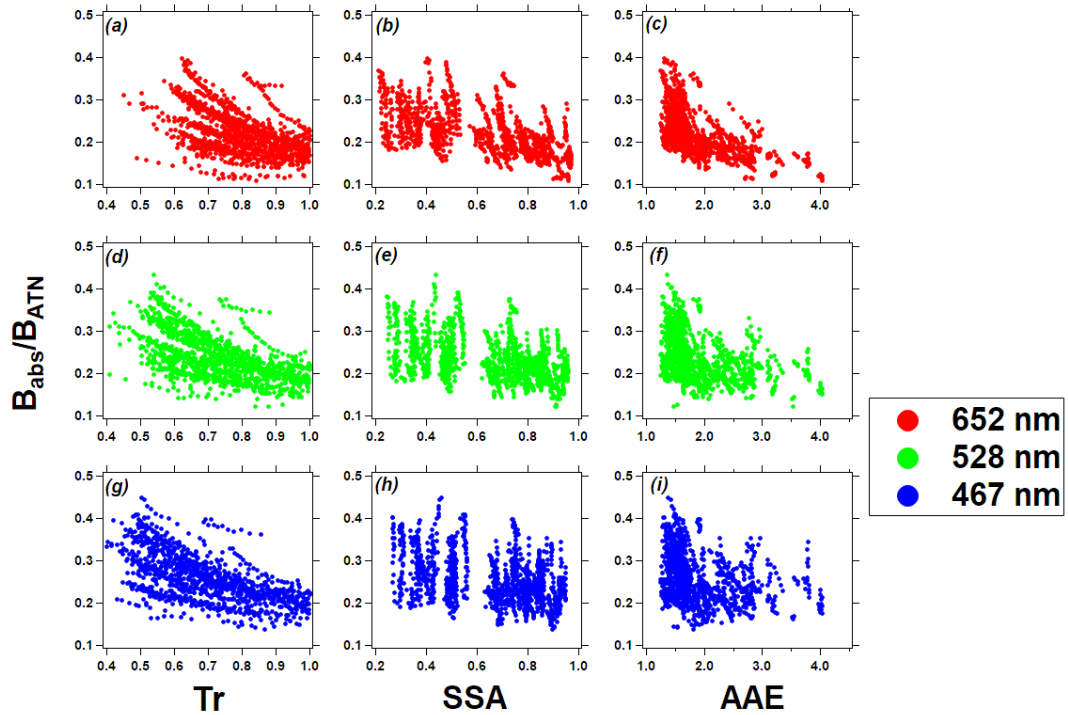

**Figure S1.** Scatter plot of  $\frac{B_{abs}}{B_{ATN}}$  against Tr, SSA, and AAE at 652 nm, 528 nm, and 467 nm.

- Prediction of  $\frac{B_{abs}}{B_{ATN}}$  using multiple regression models

Independent variables of  $\frac{B_{abs}}{B_{ATN}}$  were identified by “best subset regression” (using both adjusted  $R^2$  and Mallows’  $C_p$  as the criterion) and “stepwise regression” (both forward and backward). Variables tested for significance included Tr, SSA, AAE, and three-way interactions (Tr: SSA, Tr: AAE, SSA: AAE, and Tr: SSA: AAE). Regardless of wavelength, the best-subset models selected the same form of regression, which included all independent variables and the intercept (Table S2). However, the stepwise regression models varied across wavelengths: at 652 nm, the forward stepwise model was same as the best-subset models, but the backward stepwise model dropped two variables (Tr: AAE and Tr: SSA: AAE); at 528 nm and 467 nm, forward and backward stepwise regression produced the same model at each wavelength, but the selected variables were different at different wavelengths (see Table S2). Generally, the adjusted  $R^2$  of best-subset models was greater or equal to the adjusted  $R^2$  of stepwise models at each wavelength. As we placed a higher priority on prediction accuracy of  $\frac{B_{abs}}{B_{ATN}}$ , we selected the models that result in the greatest adjusted  $R^2$  (the model including seven predictors).

**Table S2** Predictors of  $\frac{B_{abs}}{B_{ATN}}$  using “best subset regression” and “stepwise regression”.

|                                                    | 652 nm      |                    |                     | 528 nm      |                       | 467 nm      |                       |
|----------------------------------------------------|-------------|--------------------|---------------------|-------------|-----------------------|-------------|-----------------------|
|                                                    | Best subset | Stepwise (forward) | Stepwise (backward) | Best subset | Stepwise <sup>a</sup> | Best subset | Stepwise <sup>a</sup> |
| $R^2$                                              | 0.620       | 0.620              | 0.607               | 0.544       | 0.510                 | 0.531       | 0.531                 |
| Intercept                                          | 1.08±0.15   | 1.08±0.15          | 0.84±0.03           | 1.21±0.15   | 0.84±0.03             | 1.39±0.16   | 1.39±0.16             |
|                                                    | ***         | ***                | ***                 | ***         | ***                   | ***         | ***                   |
| Tr                                                 | -0.75±0.19  | -0.75±0.19         | -0.45±0.03          | -0.89±0.20  | -0.37±0.03            | -1.12±0.23  | -1.12±0.23            |
|                                                    | ***         | ***                | ***                 | ***         | ***                   | ***         | ***                   |
| SSA                                                | -0.86±0.15  | -0.86±0.15         | -0.53±0.04          | -0.89±0.15  | -0.46±0.04            | -1.07±0.17  | -1.07±0.17            |
|                                                    | ***         | ***                | ***                 | ***         | ***                   | ***         | ***                   |
| AAE                                                | -0.30±0.10  | -0.30±0.10         | -0.15±0.02          | -0.44±0.10  | -0.20±0.02            | -0.57±0.11  | -0.57±0.11            |
|                                                    | **          | **                 | ***                 | ***         | ***                   | ***         | ***                   |
| Tr: SSA                                            | 0.79±0.19   | 0.79±0.19          | 0.38±0.04           | 0.77±0.21   | 0.17±0.04             | 0.99±0.25   | 0.99±0.25             |
|                                                    | ***         | ***                | ***                 | ***         | ***                   | ***         | ***                   |
| SSA: AAE                                           | 0.31±0.11   | 0.31±0.11          | 0.13±0.02           | 0.47±0.11   | 0.20±0.02             | 0.64±0.12   | 0.64±0.12             |
|                                                    | **          | **                 | ***                 | ***         | ***                   | ***         | ***                   |
| Tr: AAE                                            | 0.19±0.13   | 0.19±0.13          |                     | 0.34±0.14   |                       | 0.51±0.16   | 0.51±0.16             |
|                                                    | .           | .                  |                     | *           |                       | **          | **                    |
| Tr: SSA: AAE                                       | -0.24±0.13  | -0.24±0.13         |                     | -0.38±0.14  |                       | -0.59±0.17  | -0.59±0.17            |
|                                                    | .           | .                  |                     | **          |                       | ***         | ***                   |
| *** p < 0.001; ** p < 0.01; * p < 0.05; . p < 0.1. |             |                    |                     |             |                       |             |                       |

<sup>a</sup> At 528 nm and 467 nm, forward and backward stepwise approaches output the same regression model.

- *Transformation of the regression models*

A nonlinear transformation of variables is commonly used if a non-linear relationship exists between the independent and dependent variables (e.g., (Benoit, 2011; Creamer et al., 1989; Lek et al., 1996)). As seen in the first column in Fig. S1, there appears to be a logarithmic relationship between  $\frac{B_{abs}}{B_{ATN}}$  and Tr, implying that logarithmic transformation of the regression model likely improve the performance of the regression model. We tried nonlinear transformation of the dependent variable. The results generally did not improve the regression results (the adjusted  $R^2$  is smaller or equal to that of the original model); therefore, the original  $\frac{B_{abs}}{B_{ATN}}$  was retained. Then, we transformed the dependent variables. Using  $\ln(Tr)$  instead of Tr in the models improved the adjusted  $R^2$  from 0.54 to 0.57 (528 nm) and from 0.53 to 0.58 (467 nm), but no improvement at 652 nm. Moreover,  $\ln(Tr)$  has a physical meaning in that  $\ln(Tr) = -ATN$ , so the transformed results are easy to interpret. Consequently, we adopted  $\ln(Tr)$  in the regression model. No improvement was found using the transformation of SSA and AAE; therefore, the original SSA and AAE were retained. We present the results of the regression models using logarithmic transformation of Tr in Table S3.

**Table S3** Predictors of  $\frac{B_{abs}}{B_{ATN}}$  (similar to Table S2, but using  $\ln(Tr)$  instead of Tr in the model)

|                                                    | 652 nm     | 528 nm     | 467 nm     |
|----------------------------------------------------|------------|------------|------------|
| $R^2$                                              | 0.62       | 0.57       | 0.58       |
| Intercept                                          | 0.36±0.04  | 0.34±0.06  | 0.30±0.07  |
|                                                    | ***        | ***        | ***        |
| $\ln(Tr)$                                          | -0.61±0.15 | -0.73±0.14 | -0.87±0.15 |
|                                                    | ***        | ***        | ***        |
| SSA                                                | -0.09±0.04 | -0.14±0.06 | -0.11±0.07 |
|                                                    | *          | *          | .          |
| AAE                                                | -0.12±0.03 | -0.11±0.04 | -0.06±0.05 |
|                                                    | ***        | **         | .          |
| $\ln(Tr)$ : SSA                                    | 0.61±0.15  | 0.60±0.14  | 0.73±0.16  |
|                                                    | ***        | ***        | ***        |
| SSA: AAE                                           | 0.09±0.03  | 0.09±0.04  | 0.06±0.03  |
|                                                    | **         | *          | .          |
| $\ln(Tr)$ : AAE                                    | 0.19±0.10  | 0.33±0.10  | 0.45±0.10  |
|                                                    | .          | ***        | ***        |
| $\ln(Tr)$ : SSA: AAE                               | -0.22±0.11 | -0.36±0.10 | -0.49±0.11 |
|                                                    | *          | ***        | ***        |
| *** p < 0.001; ** p < 0.01; * p < 0.05; . p < 0.1. |            |            |            |

- *Assessment of the fit of regression models*

After selecting the model, we performed “F-test” to determine whether the model with fewer variables predicted  $\frac{B_{abs}}{B_{ATN}}$  better than the model with all predictors. The F-tests indicated that dropping any predictor did not improve the fit of the model (F-ratios  $\gg 1$  and P-value < 0.05).

We then analyzed the residuals of the selected model to test the adequacy of prediction. We found that the residuals were well scattered in a random pattern against  $\ln(\text{Tr})$ , SSA and AAE (Fig. S2), indicating that the models as presented in Eq. (10) in the main text give the best accuracy.

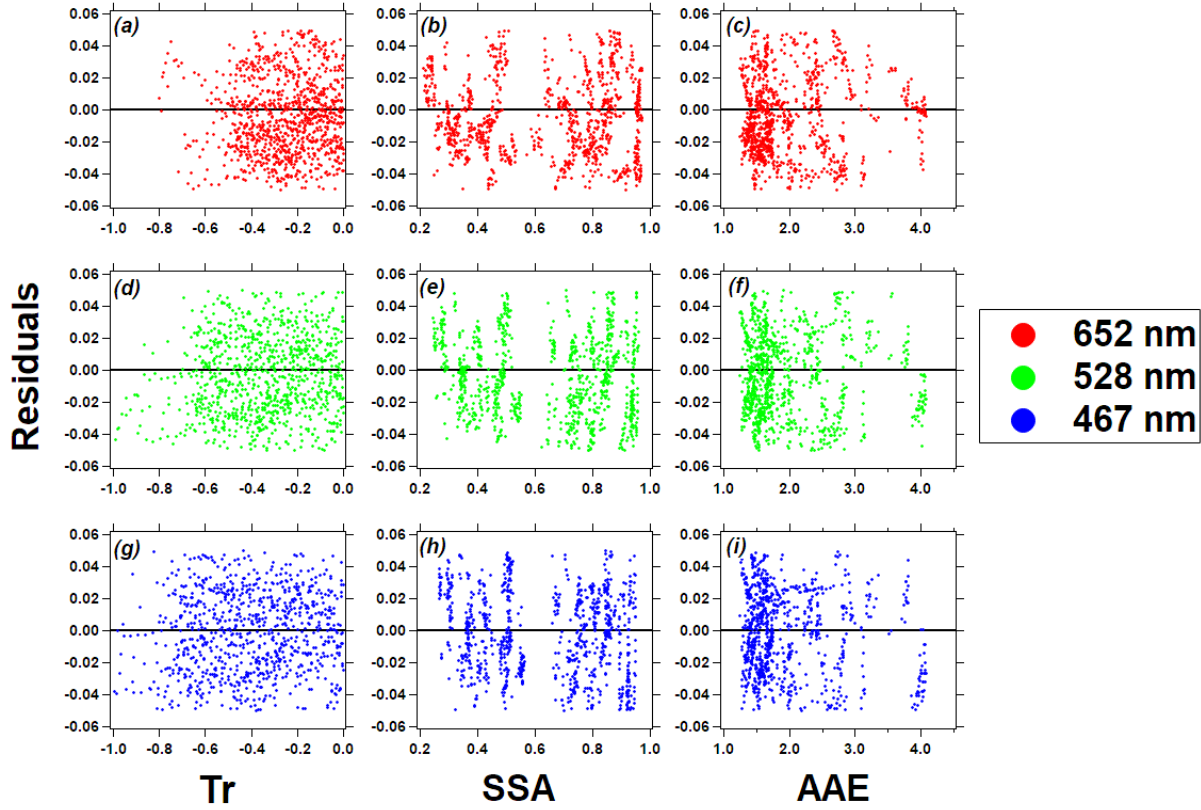

**Figure S2.** Scatter plot of residuals against Tr, SSA, and AAE at 652 nm, 528 nm, and 467 nm.

The above analyses were then repeated for TAP-related observations. The results were consistent with what we have found on the CLAP data. We present the final regression models to predict  $\frac{B_{\text{abs}}}{B_{\text{ATN}}}$  for these TAP-related observations in Table S4.

**Table S4** Predictors of  $\frac{B_{abs}}{B_{ATN}}$  for TAP-related observations

|                                                    | 652 nm            | 528 nm           | 467 nm          |
|----------------------------------------------------|-------------------|------------------|-----------------|
| R <sup>2</sup>                                     | 0.36              | 0.32             | 0.35            |
| Intercept                                          | 0.03±0.11         | 0.02±0.12        | 0.16±0.11       |
| ln(Tr)                                             | -1.20±0.39<br>**  | -0.97±0.33<br>** | -0.53±0.28<br>* |
| SSA                                                | 0.48±0.11<br>***  | 0.40±0.12<br>*** | 0.25±0.12<br>*  |
| AAE                                                | 0.20±0.07<br>**   | 0.18±0.08<br>*   | 0.10±0.08       |
| ln(Tr): SSA                                        | 1.43±0.41<br>***  | 0.99±0.34<br>**  | 0.49±0.29<br>.  |
| SSA: AAE                                           | -0.28±0.08<br>*** | -0.23±0.08<br>** | -0.15±0.08<br>. |
| ln(Tr): AAE                                        | 0.55±0.26<br>*    | 0.44±0.23<br>*   | 0.18±0.13       |
| ln(Tr): SSA: AAE                                   | -0.62±0.28<br>*   | -0.47±0.24<br>*  | -0.20±0.20      |
| *** p < 0.001; ** p < 0.01; * p < 0.05; . p < 0.1. |                   |                  |                 |

- *Interpretation of the regression models*

We can order the terms in Eq. (10) into two groups, the first group (terms that do not contain ln(Tr):  $(G_0 + G_2 \times SSA(\lambda) + G_3 \times AAE + G_6 \times SSA(\lambda) \times AAE)$ ) defines the intercept on a graph of  $\frac{B_{abs}}{B_{ATN}}$  against ln(Tr); the second group (all terms that contain the ln(Tr):  $\ln(Tr)(\lambda) \times (G_1 + G_4 \times SSA(\lambda) + G_5 \times AAE + G_7 \times SSA(\lambda) \times AAE)$ ) defines the simple slope of the line (Dawson and Richter, 2006; Zedeck, 1971). As in this form, the new correction equation can be interpreted as following:

1. For a given wavelength, the relation between ln(Tr) and  $\frac{B_{abs}}{B_{ATN}}$  varies across levels of SSA and AAE, and the combination of SSA and AAE.
2. Under different conditions of SSA and AAE, the same value of ln(Tr) may lead to various ratios between  $B_{abs}$  and  $B_{ATN}$ , and the compensation and/or reduction of  $B_{ATN}$  will be different to agree with the reference  $B_{abs}$ .

We also conduct simple slope analyses to explore the nature of the three-way interaction terms (Aiken et al., 1991). Specifically, we arbitrary assume four combinations of AAE and SSA: (1). SSA=0.95 and AAE=4; (2). SSA=0.8 and AAE=3; (3). SSA=0.8 and AAE=1.5; (4). SSA=0.4 and AAE=1. As seen in Fig. S3 (528 nm as an example), the  $\frac{B_{abs}}{B_{ATN}}$ -ln(Tr) relationship is moderated by different combinations of AAE and SSA. For example, the slope of “Comb. 4” in Fig. S3(b) is significantly different ( $p < 0.05$ ) from the slopes of other three combinations of SSA and AAE. Moreover, the intercept of the four lines are inconsistent, indicating that even when the filter is slightly loaded ( $\ln(Tr) \rightarrow 0$ ), the correction of  $B_{ATN}$  should be different for the aerosols with various optical properties.

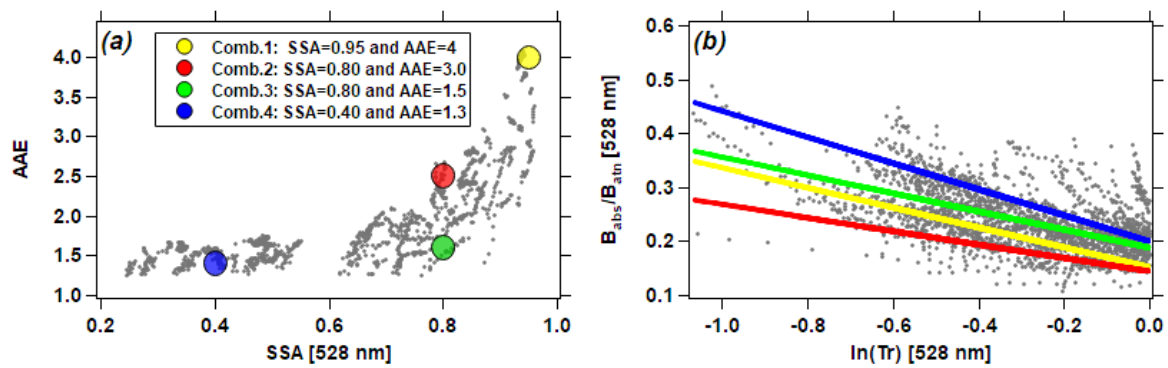

**Figure S3.** Simple slopes analysis of cross-level interaction of SSA and AAE in predicting  $\frac{B_{\text{abs}}}{B_{\text{ATN}}}$  as a function of  $\ln(\text{Tr})$  at 528 nm.

## 2. The procedure for simulating the uncertainty of the new algorithms in Section 3.5

The simulation is performed in seven steps:

1. We arbitrarily set concentration ranges of “true”  $B_{\text{abs}}$  at 652 nm from 100 to 2500  $\text{Mm}^{-1}$  and AAE from 0.5 to 4.5 (number of cases = 500).
2. For each combination of “true”  $B_{\text{abs}}$  at 652 nm and AAE ( $500 \times 500$  in total), we calculate the  $B_{\text{abs}}$  at 528 and 467 nm. For example,  $B_{\text{abs}}(467 \text{ nm}) = B_{\text{abs}}(652 \text{ nm}) \times (467/652)^{-\text{AAE}}$ .
3. With the observed power relationship between AAE and SSA (similar to Fig. 6 in the main text, but using  $B_{\text{abs}}$  instead of  $B_{\text{ATN}}$  as the absorption measurements), we compute SSA for each AAE value. The derived SSA is then used to calculate  $B_{\text{scat}}$  ( $B_{\text{scat}} = \text{SSA}/(1-\text{SSA}) \times B_{\text{abs}}$ ).
4. With the observed relationship between  $B_{\text{abs}}$  and  $B_{\text{ATN}}$  (Fig. 3 in the main text), we calculate the filter-based  $B_{\text{ATN}}$  at all three wavelengths.
5. We simulate the measurements of filter-based  $B_{\text{ATN}}$ , photoacoustic  $B_{\text{abs}}$ , and NEPH-derived  $B_{\text{scat}}$  by adding the measurement uncertainty of the instruments to the parameters described in Steps 1-4. The measurement uncertainties are forms of normal distribution (Table 1 in the main text). Figure S4 shows an example of a dataset derived by Steps 1-5.
6. We implement “Algorithm B” on the derived dataset from Step 5. The corrected filter-based results are then compared to the “true”  $B_{\text{abs}}$ .
7. The above procedure is repeated 1000 times using a Monte Carlo simulation to evaluate bias and power of our correction algorithms.

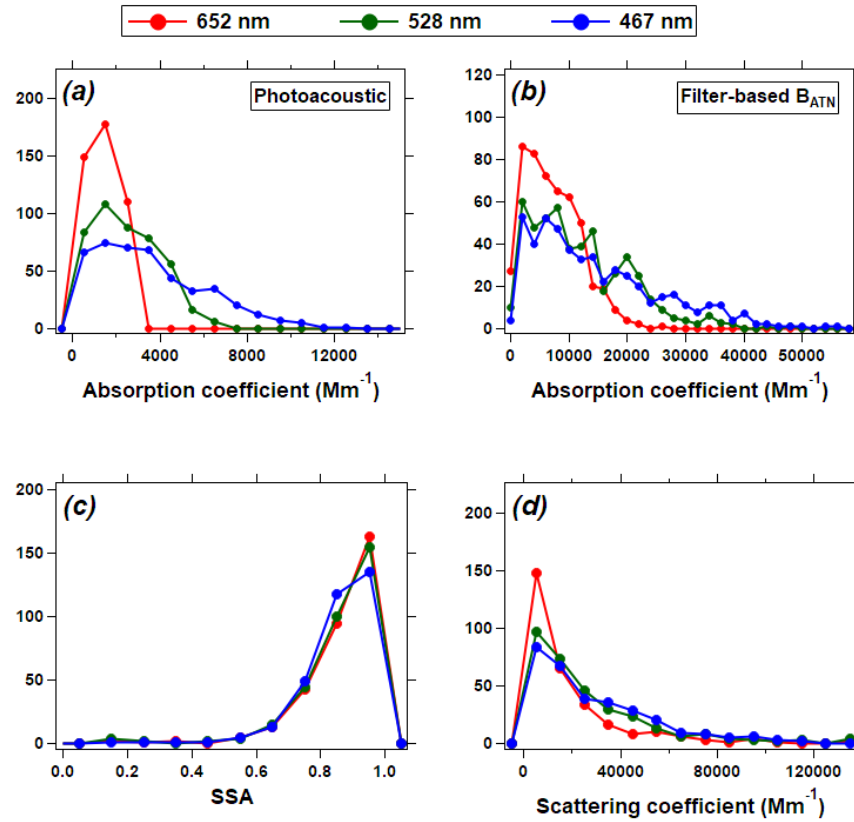

**Figure S4.** Distribution of the simulated measurements derived by Steps 1-5 in the above procedure.



## SUPPLEMENTARY TABLES

**Table S5** Relationship between the filter-based  $B_{\text{abs}}$  (FIREX-TAP and SGP-PSAP) corrected by B1999 and V2005 algorithms and the reference  $B_{\text{abs}}$  at 652, 528, and 467 nm. This table complements Table 3 from in the main text.

|                       |                              | 652 nm                     | 528 nm                     | 467 nm                     |
|-----------------------|------------------------------|----------------------------|----------------------------|----------------------------|
| <b>FIREX<br/>-TAP</b> | <b>B1999</b>                 | $y = -46 + 2.17x$ (0.83)   | $y = -55 + 1.88x$ (0.85)   | $y = -61 + 1.75x$ (0.86)   |
|                       | <b>V2005</b>                 | $y = -50 + 2.23x$ (0.85)   | $y = -62 + 2.03x$ (0.85)   | $y = -76 + 2.07x$ (0.86)   |
|                       | <b>B1999 (update coeffs)</b> | $y = -12 + 1.00x$ (0.85)   | $y = -17 + 1.00x$ (0.86)   | $y = -19 + 0.99x$ (0.87)   |
|                       | <b>V2005 (update coeffs)</b> | $y = -13 + 1.02x$ (0.87)   | $y = -16 + 1.00x$ (0.87)   | $y = -16 + 0.99x$ (0.87)   |
| <b>SGP<br/>-PSAP</b>  | <b>B1999</b>                 | $y = -6.40 + 5.86x$ (0.32) | $y = -5.24 + 4.47(0.43)$   | $y = -4.10 + 3.88x$ (0.51) |
|                       | <b>V2005</b>                 | $y = -7.10 + 6.10x$ (0.32) | $y = -6.72 + 5.11x$ (0.40) | $y = -5.43 + 5.43x$ (0.49) |
|                       | <b>B1999 (update coeffs)</b> | $y = -0.52 + 1.21x$ (0.40) | $y = -0.57 + 1.18x$ (0.50) | $y = -0.37 + 1.09x$ (0.55) |
|                       | <b>V2005 (update coeffs)</b> | $y = -0.89 + 1.40x$ (0.46) | $y = -0.76 + 1.24x$ (0.52) | $y = -0.45 + 1.11x$ (0.58) |

**Table S6** Inter-comparison between different filter-based  $B_{\text{abs}}$  corrected by the same algorithm. The value in the bracket represents the coefficient of determination ( $R^2$ ) of the linear relationship.

|                                      |               | <b>FIREX: CLAP vs. TAP</b> | <b>SGP: CLAP vs. PSAP</b> |
|--------------------------------------|---------------|----------------------------|---------------------------|
| <b>B1999</b>                         | <b>652 nm</b> | $y = 7.00 + 1.29x$ (0.91)  | $y = 0.61 + 0.77x$ (0.57) |
|                                      | <b>528 nm</b> | $y = 13.61 + 1.36x$ (0.90) | $y = 1.09 + 0.78x$ (0.53) |
|                                      | <b>467 nm</b> | $y = 25.40 + 1.30x$ (0.89) | $y = 1.61 + 0.75x$ (0.55) |
| <b>V2005</b>                         | <b>652 nm</b> | $y = 4.42 + 1.33x$ (0.90)  | $y = 0.87 + 0.68x$ (0.54) |
|                                      | <b>528 nm</b> | $y = 12.07 + 1.40x$ (0.89) | $y = 1.39 + 0.69x$ (0.53) |
|                                      | <b>467 nm</b> | $y = 28.84 + 1.32x$ (0.88) | $y = 1.85 + 0.68x$ (0.56) |
| <b>B1999<br/>(update<br/>coeffs)</b> | <b>652 nm</b> | $y = 4.20 + 1.01x$ (0.88)  | $y = 0.01 + 0.96x$ (0.61) |
|                                      | <b>528 nm</b> | $y = 8.02 + 1.01x$ (0.86)  | $y = 0.16 + 0.91x$ (0.65) |
|                                      | <b>467 nm</b> | $y = 13.18 + 1.01x$ (0.85) | $y = 0.21 + 0.90x$ (0.70) |
| <b>V2005<br/>(update<br/>coeffs)</b> | <b>652 nm</b> | $y = 3.30 + 1.02x$ (0.89)  | $y = 0.08 + 0.92x$ (0.68) |
|                                      | <b>528 nm</b> | $y = 6.81 + 1.01x$ (0.87)  | $y = 0.18 + 0.90x$ (0.68) |
|                                      | <b>467 nm</b> | $y = 11.00 + 1.01x$ (0.85) | $y = 0.24 + 0.90x$ (0.72) |

**Table S7** Updated coefficients in the B1999 and V2005 algorithms using our data <sup>a</sup>.

|                    |       |      |        | C2    | C3    | C1    |       |       |
|--------------------|-------|------|--------|-------|-------|-------|-------|-------|
| B1999 <sup>b</sup> | FIREX | CLAP | 652 nm | 3.42  | 2.00  | 0.016 |       |       |
|                    |       |      | 528 nm | 3.47  | 1.77  | 0.016 |       |       |
|                    |       |      | 467 nm | 3.49  | 1.43  | 0.016 |       |       |
|                    |       | TAP  | 652 nm | 1.58  | 2.13  | 0.016 |       |       |
|                    |       |      | 528 nm | 1.19  | 2.07  | 0.016 |       |       |
|                    |       |      | 467 nm | 1.11  | 1.93  | 0.016 |       |       |
|                    | SGP   | CLAP | 652 nm | -1.39 | 6.12  | 0.016 |       |       |
|                    |       |      | 528 nm | 0.88  | 4.03  | 0.016 |       |       |
|                    |       |      | 467 nm | 1.51  | 3.46  | 0.016 |       |       |
|                    |       | PSAP | 652 nm | 1.730 | 3.930 | 0.016 |       |       |
|                    |       |      | 528 nm | 2.230 | 3.180 | 0.016 |       |       |
|                    |       |      | 467 nm | 2.590 | 2.940 | 0.016 |       |       |
|                    |       |      |        | C4    | C5    | C6    | C7    | C1    |
| V2005 <sup>c</sup> | FIREX | CLAP | 652 nm | 0.19  | -0.34 | 0.90  | -0.83 | 0.022 |
|                    |       |      | 528 nm | 0.19  | -0.23 | 0.95  | -0.50 | 0.017 |
|                    |       |      | 467 nm | 0.20  | -0.19 | 0.95  | -0.15 | 0.015 |
|                    |       | TAP  | 652 nm | 0.28  | -0.44 | 0.88  | -1.07 | 0.022 |
|                    |       |      | 528 nm | 0.31  | -0.36 | 0.94  | -0.94 | 0.017 |
|                    |       |      | 467 nm | 0.32  | -0.35 | 0.92  | -0.79 | 0.015 |
|                    | SGP   | CLAP | 652 nm | 0.22  | -1.22 | 1.14  | -1.22 | 0.022 |
|                    |       |      | 528 nm | 0.20  | -0.94 | 1.07  | -1.09 | 0.017 |
|                    |       |      | 467 nm | 0.20  | -0.78 | 1.01  | -0.99 | 0.015 |
|                    |       | PSAP | 652 nm | 0.19  | -0.55 | 0.98  | -0.92 | 0.022 |
|                    |       |      | 528 nm | 0.19  | -0.48 | 1.00  | -0.90 | 0.017 |
|                    |       |      | 467 nm | 0.18  | -0.44 | 0.96  | -0.84 | 0.015 |

<sup>a</sup> We update the coefficients in B1999 and V2005 using the Levenberg-Marquardt algorithm (Levenberg, 1944), which is different from the original approach to fitting the coefficients in those papers. Specifically, we hold C<sub>1</sub> to be the same as the value in B1999 and V2005 and iteratively fit the other coefficients until the chi-square of the coefficients are minimized.

<sup>b</sup> The general form of the B1999 algorithm:  $B_{\text{abs}} = B_{\text{ATN}} \times \frac{1}{C_2 \times \text{Tr} + C_3} - C_1 \times B_{\text{scat}}$

<sup>c</sup> The general form of the V2005 algorithm:  $B_{\text{abs}} = B_{\text{ATN}} \times C_4 + C_5 \times (C_6 + C_7 \times \text{SSA}) \times \ln(\text{Tr}) - C_1 \times B_{\text{scat}}$

**Table S8** Updated coefficients in the B1999 algorithm using different subsets of AAE and SSA for the FIREX measurements. The aerosols with different subranges of AAE and SSA result in different values of C2 and C3 for different wavelengths, which are different from the “default” values in B1999. The blank cells represent combinations with no available data.

| CLAP   | C2      |            | wavelength | SSA     |         |        | TAP     | C2         |         | wavelength | SSA   |         |        |
|--------|---------|------------|------------|---------|---------|--------|---------|------------|---------|------------|-------|---------|--------|
|        |         |            |            | <0.4    | 0.4-0.8 | 0.8-1  |         |            |         |            | <0.4  | 0.4-0.8 | 0.8-1  |
|        | AAE     | <1.8       | 652 nm     | 4.384   | 3.249   |        |         | AAE        | <1.8    | 652 nm     | 3.419 | 1.917   |        |
|        |         |            | 528 nm     | 3.988   | 3.395   |        |         |            |         | 528 nm     | 3.196 | 1.929   |        |
|        |         |            | 467 nm     | 3.778   | 3.132   |        |         |            |         | 467 nm     | 2.954 | 1.895   |        |
|        |         | 1.8-3.4    | 652 nm     |         | 3.312   | 1.583  |         |            | 1.8-3.4 | 652 nm     |       | 1.355   | -3.209 |
|        |         |            | 528 nm     |         | 4.150   | 2.656  |         |            |         | 528 nm     |       | 2.462   | -1.184 |
|        |         |            | 467 nm     |         | 3.982   | 2.576  |         |            |         | 467 nm     |       | 2.761   | -0.330 |
|        | >3.4    | 652 nm     |            | 3.908   | >3.4    | 652 nm |         |            | 0.992   |            |       |         |        |
|        |         | 528 nm     |            | 3.800   |         | 528 nm |         |            | 1.212   |            |       |         |        |
| 467 nm |         | 3.619      |            | 467 nm  |         | 1.537  |         |            |         |            |       |         |        |
| C3     |         | wavelength | SSA        |         |         | C3     |         | wavelength | SSA     |            |       |         |        |
|        |         |            | <0.4       | 0.4-0.8 | 0.8-1   |        |         |            | <0.4    | 0.4-0.8    | 0.8-1 |         |        |
| AAE    | <1.8    | 652 nm     | 0.623      | 2.049   |         | AAE    | <1.8    | 652 nm     | 0.101   | 2.098      |       |         |        |
|        |         | 528 nm     | 0.960      | 1.664   |         |        |         | 528 nm     | 0.234   | 1.563      |       |         |        |
|        |         | 467 nm     | 0.941      | 1.619   |         |        |         | 467 nm     | 0.380   | 1.394      |       |         |        |
|        | 1.8-3.4 | 652 nm     |            | 2.726   | 4.085   |        | 1.8-3.4 | 652 nm     |         | 2.664      | 6.215 |         |        |
|        |         | 528 nm     |            | 1.768   | 2.618   |        |         | 528 nm     |         | 1.228      | 3.791 |         |        |
|        |         | 467 nm     |            | 1.733   | 2.143   |        |         | 467 nm     |         | 0.549      | 2.930 |         |        |
|        | >3.4    | 652 nm     |            | 1.881   | >3.4    |        | 652 nm  |            | 3.503   |            |       |         |        |
|        |         | 528 nm     |            | 1.199   |         |        | 528 nm  |            | 2.365   |            |       |         |        |
|        |         | 467 nm     |            | 0.872   |         |        | 467 nm  |            | 1.835   |            |       |         |        |

**Table S9** Updated coefficients in the V2005 algorithm using different subsets of AAE and SSA for the FIREX measurements. The aerosols with different subranges of AAE and SSA result in different values of C4 - C7 for different wavelengths, which are different from the “default” values in V2005. The blank cells represent combinations with no available data.

| CLAP   | C4      |            | wavelength | SSA     |         |       |
|--------|---------|------------|------------|---------|---------|-------|
|        |         |            |            | <0.4    | 0.4-0.8 | 0.8-1 |
|        | AAE     | <1.8       | 652 nm     | 0.194   | 0.189   |       |
|        |         |            | 528 nm     | 0.197   | 0.189   |       |
|        |         |            | 467 nm     | 0.204   | 0.200   |       |
|        |         | 1.8-3.4    | 652 nm     |         | 0.169   | 0.184 |
|        |         |            | 528 nm     |         | 0.172   | 0.192 |
|        |         |            | 467 nm     |         | 0.173   | 0.210 |
|        |         | >3.4       | 652 nm     |         |         | 0.191 |
|        |         |            | 528 nm     |         |         | 0.202 |
| 467 nm |         |            |            |         | 0.218   |       |
| C5     |         | wavelength | SSA        |         |         |       |
|        |         |            | <0.4       | 0.4-0.8 | 0.8-1   |       |
| AAE    | <1.8    | 652 nm     | -0.353     | -0.225  |         |       |
|        |         | 528 nm     | -0.384     | -0.318  |         |       |
|        |         | 467 nm     | -0.362     | -0.343  |         |       |
|        | 1.8-3.4 | 652 nm     |            | -0.070  | -0.035  |       |
|        |         | 528 nm     |            | 0.188   | -0.059  |       |
|        |         | 467 nm     |            | -0.093  | -0.489  |       |
|        | >3.4    | 652 nm     |            |         | -0.277  |       |
|        |         | 528 nm     |            |         | -0.392  |       |
|        |         | 467 nm     |            |         | -0.216  |       |
| C6     |         | wavelength | SSA        |         |         |       |
|        |         |            | <0.4       | 0.4-0.8 | 0.8-1   |       |
| AAE    | <1.8    | 652 nm     | 0.795      | 0.852   |         |       |
|        |         | 528 nm     | 0.861      | 0.880   |         |       |
|        |         | 467 nm     | 0.814      | 0.851   |         |       |
|        | 1.8-3.4 | 652 nm     |            | 1.026   | 1.038   |       |
|        |         | 528 nm     |            | 2.230   | -0.327  |       |
|        |         | 467 nm     |            | -2.056  | 0.979   |       |
|        | >3.4    | 652 nm     |            |         | 1.071   |       |
|        |         | 528 nm     |            |         | 1.094   |       |
|        |         | 467 nm     |            |         | 0.969   |       |
| C7     |         | wavelength | SSA        |         |         |       |
|        |         |            | <0.4       | 0.4-0.8 | 0.8-1   |       |
| AAE    | <1.8    | 652 nm     | -0.517     | -0.579  |         |       |
|        |         | 528 nm     | -1.016     | -0.810  |         |       |
|        |         | 467 nm     | -0.645     | -0.784  |         |       |
|        | 1.8-3.4 | 652 nm     |            | 0.341   | 0.209   |       |
|        |         | 528 nm     |            | -3.842  | 2.175   |       |
|        |         | 467 nm     |            | 4.561   | -0.863  |       |
|        | >3.4    | 652 nm     |            |         | -0.631  |       |
|        |         | 528 nm     |            |         | -0.691  |       |
|        |         | 467 nm     |            |         | 0.044   |       |

| TAP    | C4      |            | wavelength | SSA     |         |       |
|--------|---------|------------|------------|---------|---------|-------|
|        |         |            |            | <0.4    | 0.4-0.8 | 0.8-1 |
|        | AAE     | <1.8       | 652 nm     | 0.276   | 0.254   |       |
|        |         |            | 528 nm     | 0.280   | 0.284   |       |
|        |         |            | 467 nm     | 0.285   | 0.302   |       |
|        |         | 1.8-3.4    | 652 nm     |         | 0.254   | 0.335 |
|        |         |            | 528 nm     |         | 0.280   | 0.376 |
|        |         |            | 467 nm     |         | 0.291   | 0.379 |
|        |         | >3.4       | 652 nm     |         |         | 0.245 |
|        |         |            | 528 nm     |         |         | 0.285 |
| 467 nm |         |            |            |         | 0.297   |       |
| C5     |         | wavelength | SSA        |         |         |       |
|        |         |            | <0.4       | 0.4-0.8 | 0.8-1   |       |
| AAE    | <1.8    | 652 nm     | -0.057     | -0.075  |         |       |
|        |         | 528 nm     | -0.175     | -0.365  |         |       |
|        |         | 467 nm     | -0.146     | -0.507  |         |       |
|        | 1.8-3.4 | 652 nm     |            | -2.349  | -1.234  |       |
|        |         | 528 nm     |            | -4.758  | -0.740  |       |
|        |         | 467 nm     |            | -1.298  | 0.224   |       |
|        | >3.4    | 652 nm     |            |         | 0.202   |       |
|        |         | 528 nm     |            |         | -0.093  |       |
|        |         | 467 nm     |            |         | -0.216  |       |
| C6     |         | wavelength | SSA        |         |         |       |
|        |         |            | <0.4       | 0.4-0.8 | 0.8-1   |       |
| AAE    | <1.8    | 652 nm     | -6.739     | 0.613   |         |       |
|        |         | 528 nm     | -0.605     | 0.945   |         |       |
|        |         | 467 nm     | -1.151     | 0.933   |         |       |
|        | 1.8-3.4 | 652 nm     |            | 1.141   | 1.130   |       |
|        |         | 528 nm     |            | 0.976   | 0.938   |       |
|        |         | 467 nm     |            | 1.115   | 0.900   |       |
|        | >3.4    | 652 nm     |            |         | 0.750   |       |
|        |         | 528 nm     |            |         | 1.106   |       |
|        |         | 467 nm     |            |         | 1.004   |       |
| C7     |         | wavelength | SSA        |         |         |       |
|        |         |            | <0.4       | 0.4-0.8 | 0.8-1   |       |
| AAE    | <1.8    | 652 nm     | 41.858     | 0.725   |         |       |
|        |         | 528 nm     | 8.037      | -0.892  |         |       |
|        |         | 467 nm     | 10.428     | -1.052  |         |       |
|        | 1.8-3.4 | 652 nm     |            | -1.472  | -1.474  |       |
|        |         | 528 nm     |            | -1.240  | -1.238  |       |
|        |         | 467 nm     |            | -1.133  | -0.904  |       |
|        | >3.4    | 652 nm     |            |         | -1.031  |       |
|        |         | 528 nm     |            |         | -0.248  |       |
|        |         | 467 nm     |            |         | -0.487  |       |

**Table S10** Updated coefficients in the B1999 algorithm using different subsets of AAE and SSA for the SGP measurements. The aerosols with different subranges of AAE and SSA result in different values of C2 and C3 for different wavelengths, which are different from the “default” values in B1999. The blank cells represent combinations with no available data.

| CLAP | C2         |        | wavelength | SSA   |        |        |
|------|------------|--------|------------|-------|--------|--------|
|      | AAE        | <1     | 652 nm     | 1.045 | -1.532 | 3.071  |
|      |            |        | 528 nm     | 1.894 | 1.559  | 2.141  |
|      |            |        | 467 nm     | 1.362 | 4.005  | 2.165  |
|      |            | 1-2    | 652 nm     |       | 0.110  | -7.351 |
|      |            |        | 528 nm     |       | 1.966  | -1.961 |
|      |            |        | 467 nm     |       | 2.069  | 0.175  |
|      |            | >2     | 652 nm     |       |        | -0.276 |
|      |            |        | 528 nm     |       |        | 3.928  |
|      |            |        | 467 nm     |       |        | 2.900  |
| C3   | wavelength | SSA    |            |       |        |        |
| AAE  | <1         | 652 nm | 3.684      | 6.600 | 3.825  |        |
|      |            | 528 nm | 3.165      | 4.198 | 4.612  |        |
|      |            | 467 nm | 3.751      | 2.258 | 4.735  |        |
|      | 1-2        | 652 nm |            | 5.480 | 12.699 |        |
|      |            | 528 nm |            | 3.667 | 7.489  |        |
|      |            | 467 nm |            | 3.592 | 5.476  |        |
|      | >2         | 652 nm |            |       | 6.255  |        |
|      |            | 528 nm |            |       | 1.805  |        |
|      |            | 467 nm |            |       | 2.551  |        |

| PSAP | C2         |        | wavelength | SSA   |        |       |
|------|------------|--------|------------|-------|--------|-------|
|      | AAE        | <1     | 652 nm     | 3.887 | -0.461 | 1.924 |
|      |            |        | 528 nm     | 4.164 | -1.480 | 3.588 |
|      |            |        | 467 nm     | 4.627 | 0.858  | 1.154 |
|      |            | 1-2    | 652 nm     |       | 1.186  | 1.376 |
|      |            |        | 528 nm     |       | 2.555  | 2.338 |
|      |            |        | 467 nm     |       | 3.234  | 2.719 |
|      |            | >2     | 652 nm     |       |        | 1.959 |
|      |            |        | 528 nm     |       |        | 1.989 |
|      |            |        | 467 nm     |       |        | 2.551 |
| C3   | wavelength | SSA    |            |       |        |       |
| AAE  | <1         | 652 nm | 2.308      | 6.071 | 4.609  |       |
|      |            | 528 nm | 2.072      | 6.907 | 3.571  |       |
|      |            | 467 nm | 2.081      | 5.358 | 5.217  |       |
|      | 1-2        | 652 nm |            | 4.761 | 5.033  |       |
|      |            | 528 nm |            | 3.367 | 3.849  |       |
|      |            | 467 nm |            | 3.031 | 3.515  |       |
|      | >2         | 652 nm |            |       | 4.939  |       |
|      |            | 528 nm |            |       | 3.747  |       |
|      |            | 467 nm |            |       | 3.212  |       |

**Table S11** Updated coefficients in the V2005 algorithm using different subsets of AAE and SSA for the SGP measurements. The aerosols with different subranges of AAE and SSA result in different values of C4 - C7 for different wavelengths, which are different from the “default” values in V2005. The blank cells represent combinations with no available data.

|        |     |        |            |            |         |        |
|--------|-----|--------|------------|------------|---------|--------|
| CLAP   | C4  |        | wavelength | SSA        |         |        |
|        |     |        |            | <0.8       | 0.8-0.9 | 0.9-1  |
|        |     |        | 652 nm     | 0.210      | 0.202   | 0.152  |
|        | AAE | <1     | 528 nm     | 0.196      | 0.172   | 0.152  |
|        |     |        | 467 nm     | 0.193      | 0.159   | 0.145  |
|        |     |        | 652 nm     |            | 0.184   | 0.194  |
|        |     | 1-2    | 528 nm     |            | 0.179   | 0.182  |
|        |     |        | 467 nm     |            | 0.176   | 0.176  |
|        |     |        | 652 nm     |            |         | 0.172  |
|        |     | >2     | 528 nm     |            |         | 0.176  |
|        |     |        | 467 nm     |            |         | 0.182  |
|        |     | C5     |            | wavelength | SSA     |        |
|        |     |        |            | <0.8       | 0.8-0.9 | 0.9-1  |
|        | AAE | <1     | 652 nm     | -0.596     | -2.474  | -2.370 |
|        |     |        | 528 nm     | -0.517     | -1.512  | -1.681 |
|        |     |        | 467 nm     | -0.571     | -1.161  | -1.102 |
|        |     | 1-2    | 652 nm     |            | -1.378  | -3.306 |
|        |     |        | 528 nm     |            | -0.267  | -1.799 |
|        |     |        | 467 nm     |            | -0.182  | -1.509 |
|        |     | >2     | 652 nm     |            |         | -2.253 |
|        |     |        | 528 nm     |            |         | 1.733  |
|        |     |        | 467 nm     |            |         | -0.094 |
|        | C6  |        | wavelength | SSA        |         |        |
|        |     |        |            | <0.8       | 0.8-0.9 | 0.9-1  |
|        | AAE | <1     | 652 nm     | 0.922      | 1.027   | 1.204  |
|        |     |        | 528 nm     | 0.943      | 1.403   | 1.242  |
|        |     |        | 467 nm     | 0.922      | 1.125   | 0.998  |
|        |     | 1-2    | 652 nm     |            | 1.183   | 1.276  |
|        |     |        | 528 nm     |            | 0.965   | 1.215  |
|        |     |        | 467 nm     |            | 0.952   | 1.104  |
|        |     | >2     | 652 nm     |            |         | 1.415  |
|        |     |        | 528 nm     |            |         | 1.162  |
|        |     |        | 467 nm     |            |         | 0.957  |
|        | C7  |        | wavelength | SSA        |         |        |
|        |     |        |            | <0.8       | 0.8-0.9 | 0.9-1  |
|        | AAE | <1     | 652 nm     | -1.124     | -1.216  | -1.256 |
|        |     |        | 528 nm     | -1.084     | -1.579  | -1.313 |
|        |     |        | 467 nm     | -1.111     | -1.194  | -1.036 |
|        |     | 1-2    | 652 nm     |            | -1.371  | -1.426 |
| 528 nm |     |        |            | -0.862     | -1.336  |        |
| 467 nm |     |        |            | -0.718     | -1.187  |        |
| >2     |     | 652 nm |            |            | -1.500  |        |
|        |     | 528 nm |            |            | -1.335  |        |
|        |     | 467 nm |            |            | 0.065   |        |

|        |     |        |            |            |         |        |
|--------|-----|--------|------------|------------|---------|--------|
| PSAP   | C4  |        | wavelength | SSA        |         |        |
|        |     |        |            | <0.8       | 0.8-0.9 | 0.9-1  |
|        |     |        | 652 nm     | 0.172      | 0.182   | 0.163  |
|        | AAE | <1     | 528 nm     | 0.161      | 0.183   | 0.146  |
|        |     |        | 467 nm     | 0.144      | 0.159   | 0.154  |
|        |     |        | 652 nm     |            | 0.171   | 0.167  |
|        |     | 1-2    | 528 nm     |            | 0.170   | 0.166  |
|        |     |        | 467 nm     |            | 0.159   | 0.163  |
|        |     |        | 652 nm     |            |         | 0.157  |
|        |     | >2     | 528 nm     |            |         | 0.178  |
|        |     |        | 467 nm     |            |         | 0.174  |
|        |     | C5     |            | wavelength | SSA     |        |
|        |     |        |            | <0.8       | 0.8-0.9 | 0.9-1  |
|        | AAE | <1     | 652 nm     | -0.805     | 0.611   | -0.137 |
|        |     |        | 528 nm     | -0.624     | 0.133   | -0.072 |
|        |     |        | 467 nm     | -0.986     | -0.535  | -0.049 |
|        |     | 1-2    | 652 nm     |            | -0.652  | -0.008 |
|        |     |        | 528 nm     |            | -0.411  | -0.084 |
|        |     |        | 467 nm     |            | -0.381  | -0.032 |
|        |     | >2     | 652 nm     |            |         | 0.773  |
|        |     |        | 528 nm     |            |         | -0.094 |
|        |     |        | 467 nm     |            |         | -0.058 |
|        | C6  |        | wavelength | SSA        |         |        |
|        |     |        |            | <0.8       | 0.8-0.9 | 0.9-1  |
|        | AAE | <1     | 652 nm     | 1.024      | 0.865   | 0.977  |
|        |     |        | 528 nm     | 1.002      | 0.569   | 1.116  |
|        |     |        | 467 nm     | 1.036      | 0.921   | 0.870  |
|        |     | 1-2    | 652 nm     |            | 0.949   | 1.289  |
|        |     |        | 528 nm     |            | 0.973   | 1.025  |
|        |     |        | 467 nm     |            | 0.937   | 0.976  |
|        |     | >2     | 652 nm     |            |         | 0.854  |
|        |     |        | 528 nm     |            |         | 1.043  |
|        |     |        | 467 nm     |            |         | 1.053  |
|        | C7  |        | wavelength | SSA        |         |        |
|        |     |        |            | <0.8       | 0.8-0.9 | 0.9-1  |
|        | AAE | <1     | 652 nm     | -1.269     | -0.994  | -0.739 |
|        |     |        | 528 nm     | -1.096     | -0.412  | -0.317 |
|        |     |        | 467 nm     | -1.190     | -1.019  | -0.410 |
|        |     | 1-2    | 652 nm     |            | -1.025  | 2.107  |
| 528 nm |     |        |            | -0.922     | -0.477  |        |
| 467 nm |     |        |            | -0.837     | 2.856   |        |
| >2     |     | 652 nm |            |            | -0.961  |        |
|        |     | 528 nm |            |            | -0.548  |        |
|        |     | 467 nm |            |            | 0.088   |        |

**Table S12** Computation of the quartile deviation for the derived coefficient values in “Algorithm A” using half of the CLAP observation. The box-and-whisker plots of the derived coefficient values are presented in Fig. S7.

|           | <b>FIREX</b>  |               |               | <b>SGP</b>    |               |               |
|-----------|---------------|---------------|---------------|---------------|---------------|---------------|
|           | <b>652 nm</b> | <b>528 nm</b> | <b>467 nm</b> | <b>652 nm</b> | <b>528 nm</b> | <b>467 nm</b> |
| <b>G0</b> | 0.012         | 0.012         | 0.015         | 0.043         | 0.037         | 0.043         |
| <b>G1</b> | 0.057         | 0.047         | 0.049         | 0.428         | 0.333         | 0.309         |
| <b>G2</b> | 0.023         | 0.022         | 0.025         | 0.059         | 0.050         | 0.056         |
| <b>G3</b> | 0.008         | 0.009         | 0.010         | 0.035         | 0.029         | 0.032         |
| <b>G4</b> | 0.094         | 0.077         | 0.074         | 0.573         | 0.409         | 0.388         |
| <b>G5</b> | 0.013         | 0.013         | 0.015         | 0.050         | 0.041         | 0.042         |
| <b>G6</b> | 0.044         | 0.036         | 0.035         | 0.340         | 0.244         | 0.224         |
| <b>G7</b> | 0.068         | 0.036         | 0.054         | 0.460         | 0.334         | 0.285         |

## SUPPLEMENTARY FIGURES

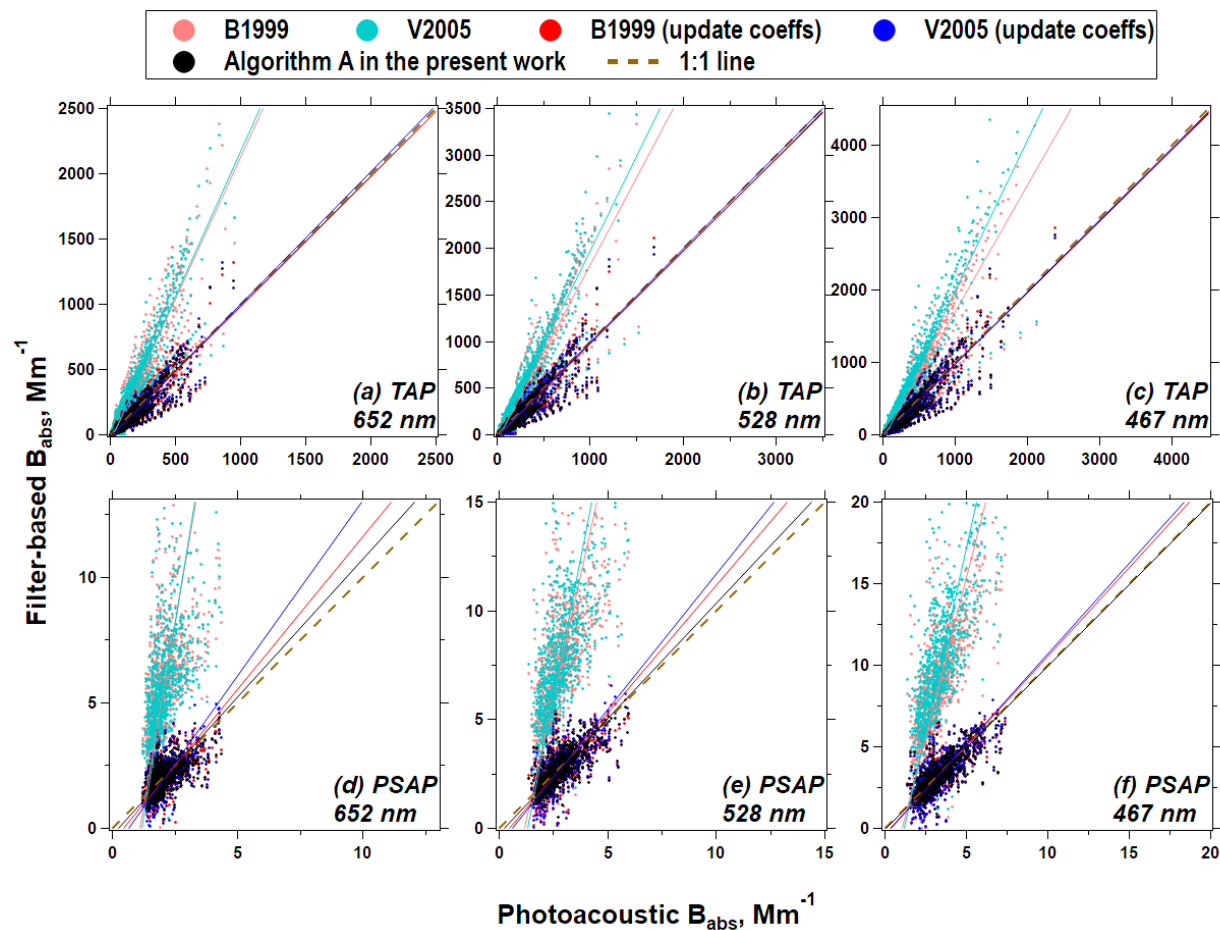

**Figure S5.** Inter-comparison between the filter-based  $B_{\text{abs}}$  (FIREX-TAP and SGP-PSAP) corrected by different algorithms and the reference  $B_{\text{abs}}$  at 652, 528, and 467 nm. The solid lines represent linear regressions, while the dashed line is a 1:1 line.



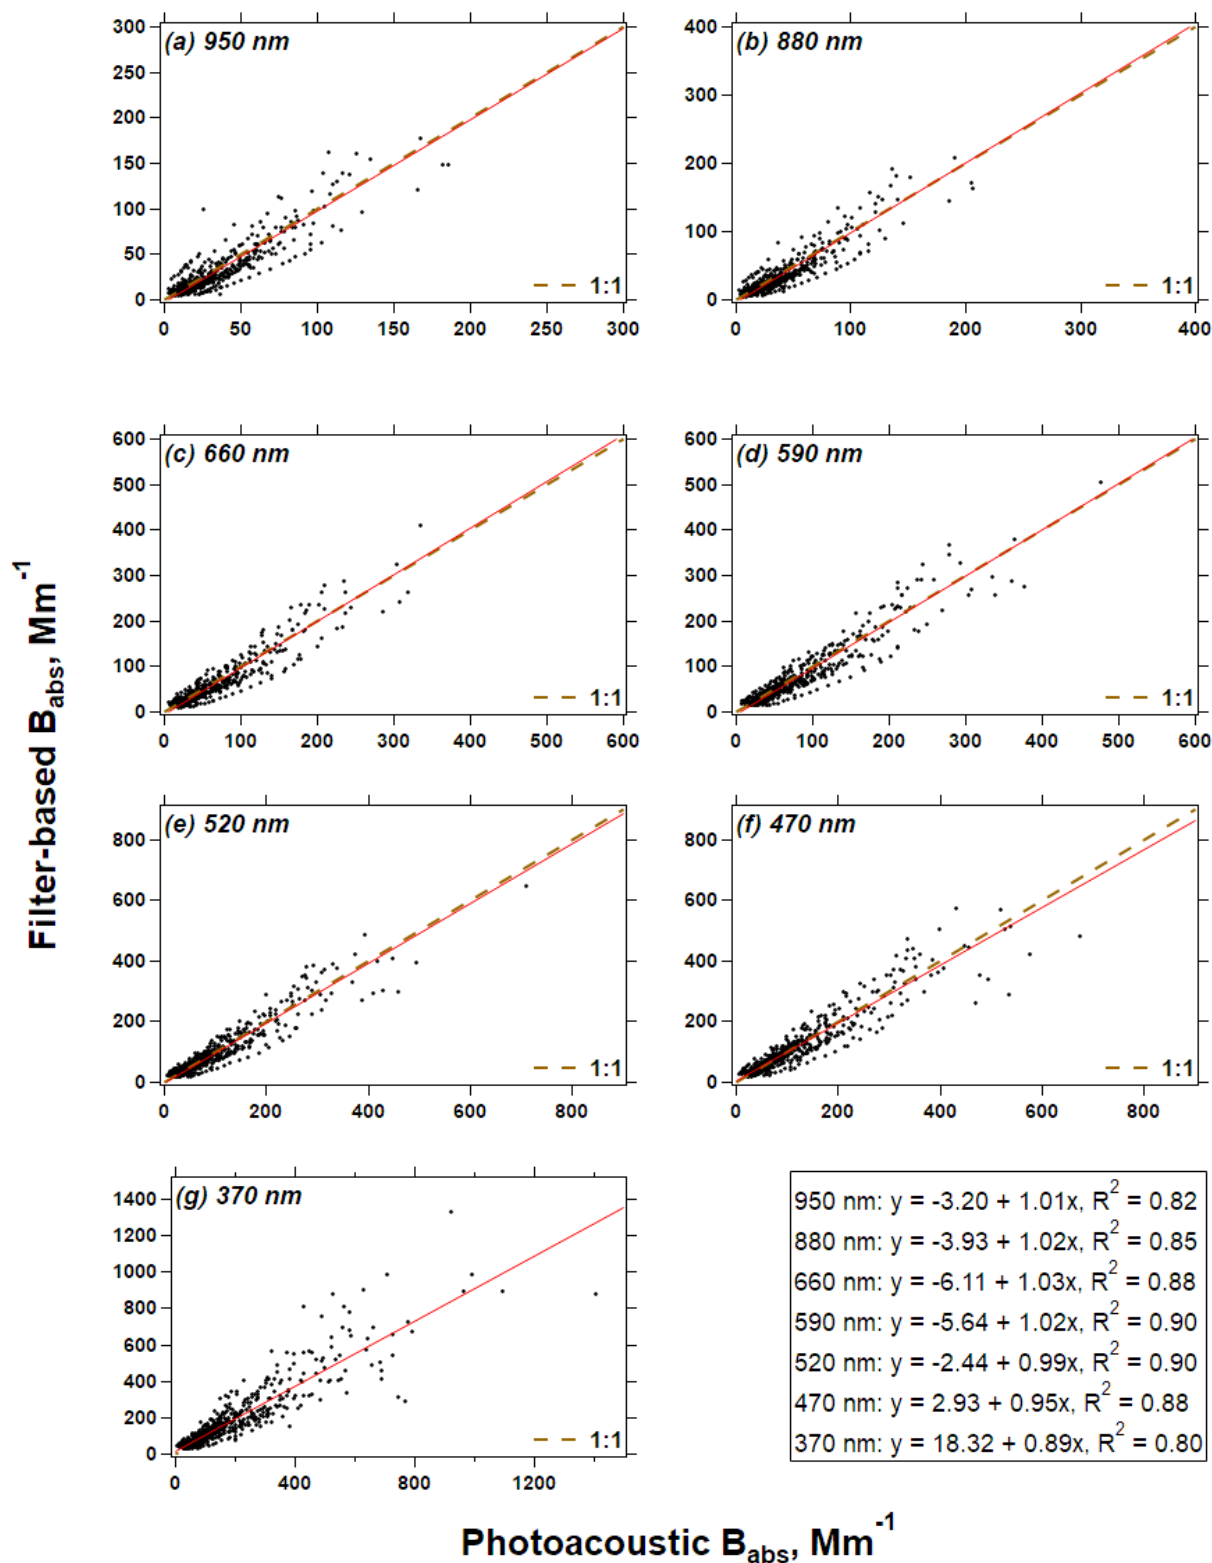

**Figure S6.** The AETH-derived  $B_{\text{abs}}$  (corrected by “Algorithm A” in the present work) versus photoacoustic  $B_{\text{abs}}$  for the FIREX aerosols. The solid lines represent a linear regression, while the dashed lines are 1:1 lines.

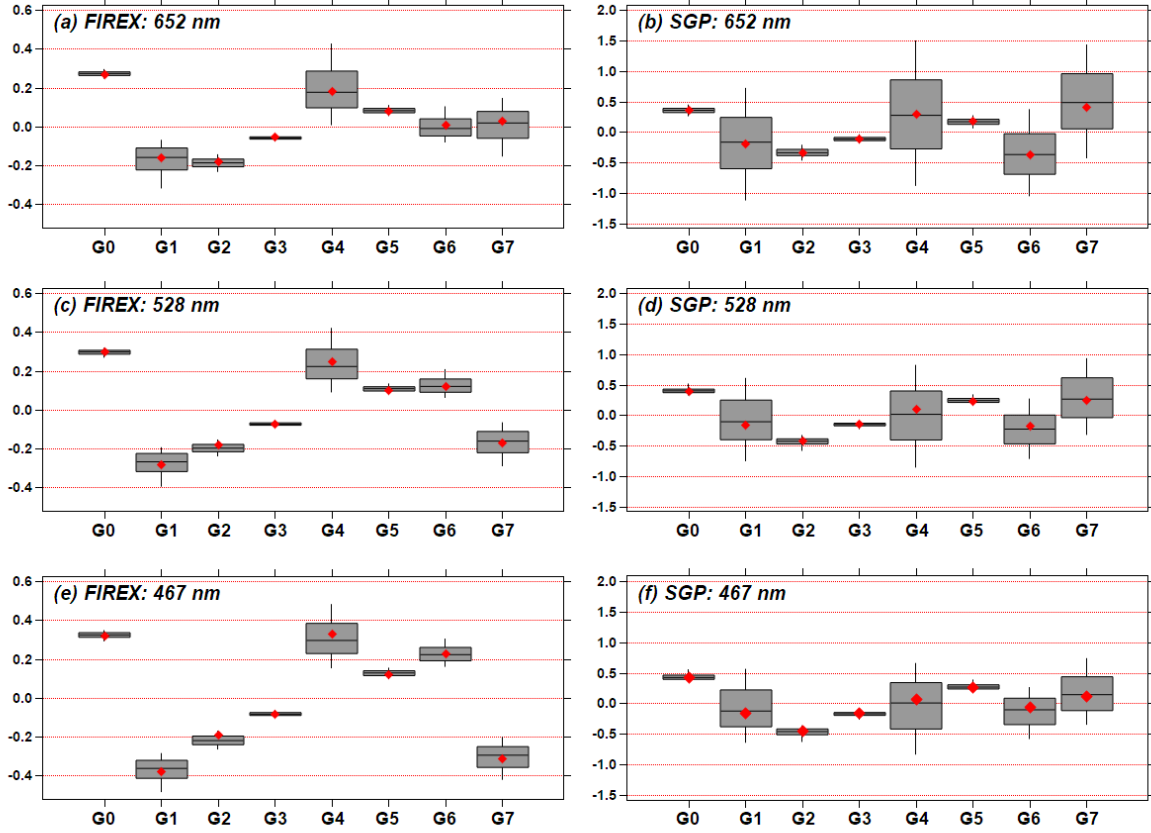

**Derived coefficient values using “Algorithm A”**

**Figure S7.** The distribution of derived coefficient values for “Algorithm A” using half of the CLAP observation. The red dots represent the coefficient values derived using all observations (as shown in Table 4).

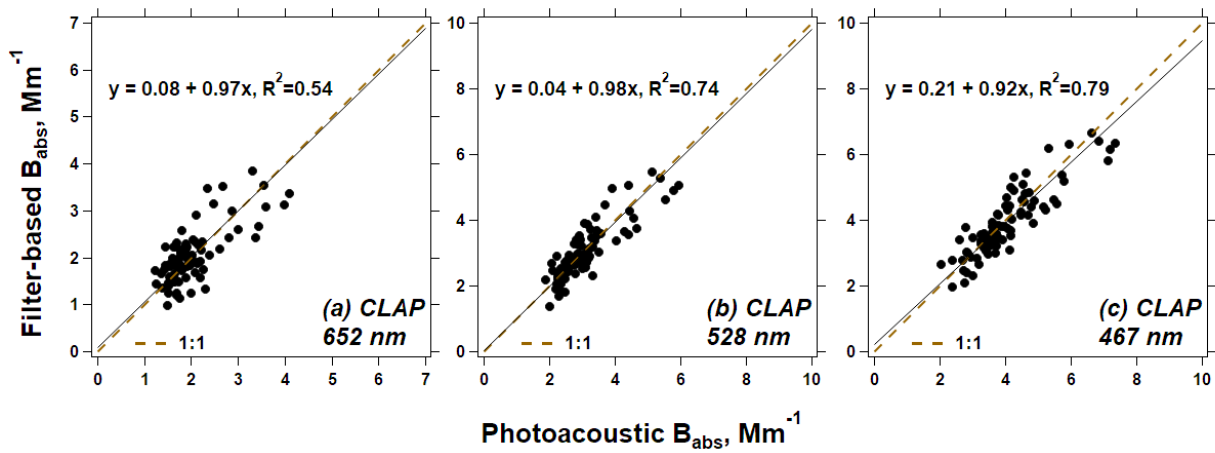

**Figure S8.** Inter-comparison between the CLAP-derived  $B_{abs}$  corrected by “Algorithm C” in the present work and reference  $B_{abs}$  at 652, 528, and 467 nm for the subsamples of SGP measurements (AAE-SSA prediction error is within 30%). The solid lines represent a linear regression, while the dashed lines are 1:1 lines.

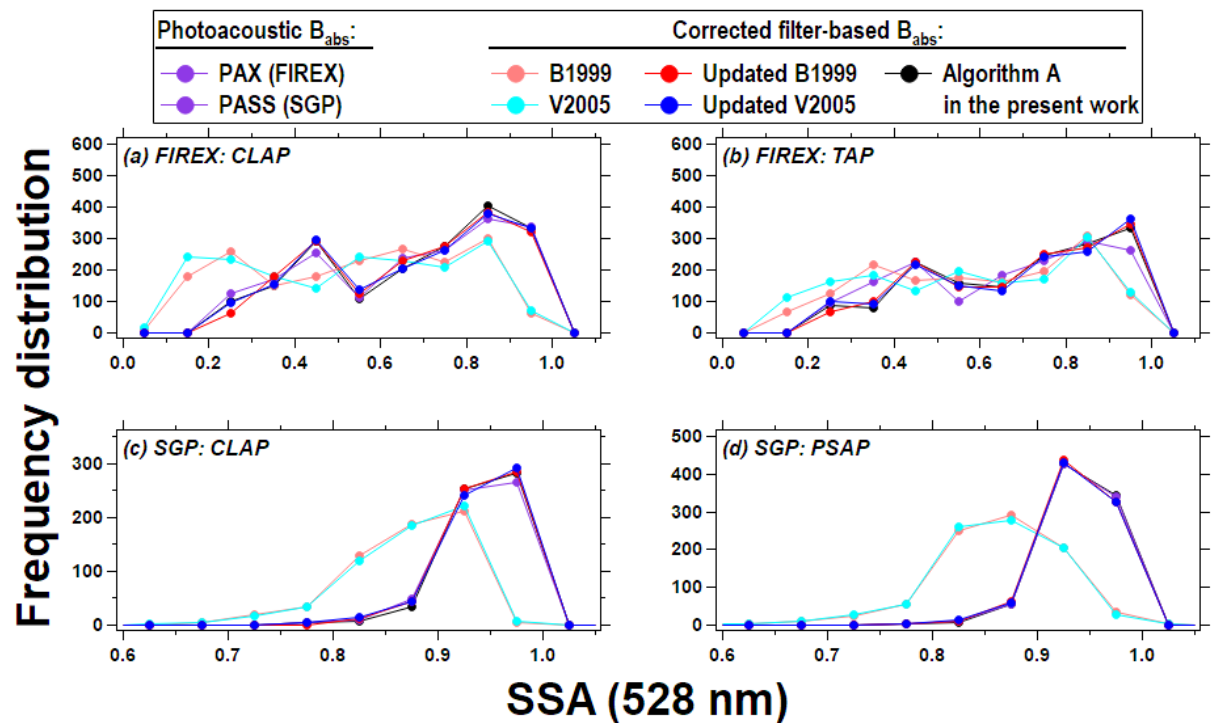

**Figure S9.** The frequency distribution of SSA (528 nm) calculated for different instrument/correction combinations of  $B_{abs}$  and  $B_{scat}$ .

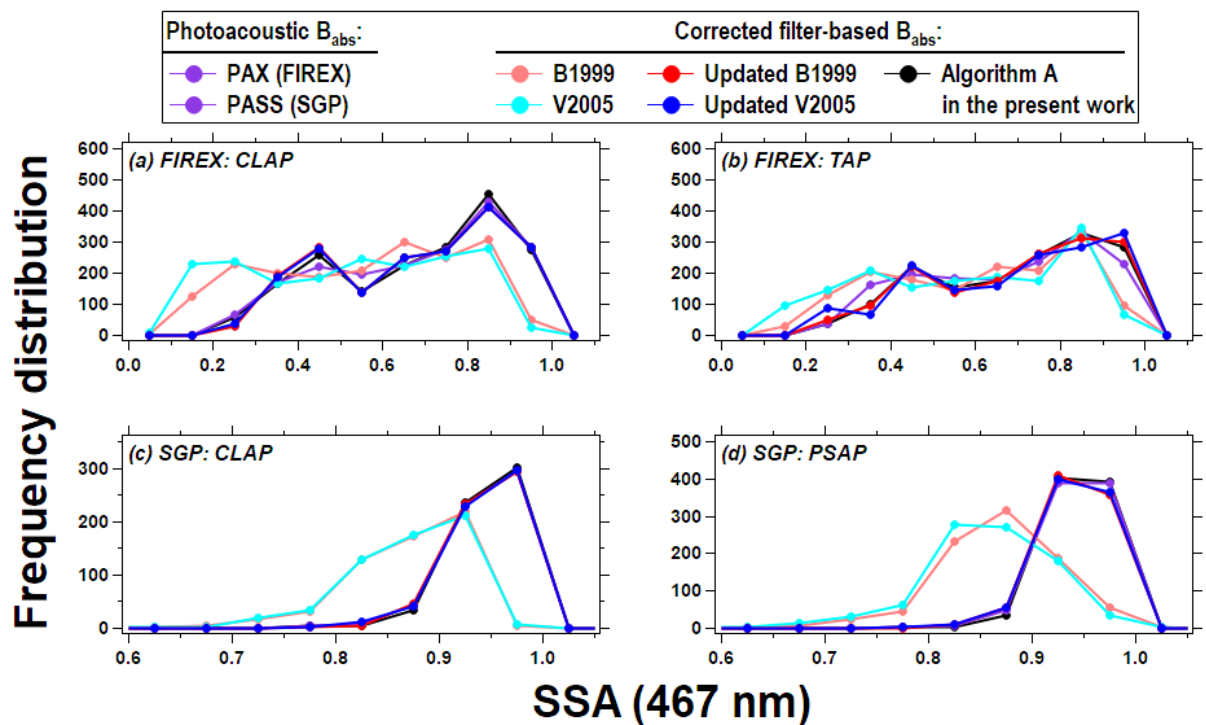

**Figure S10.** The frequency distribution of SSA (467 nm) calculated for different instrument/correction combinations of  $B_{abs}$  and  $B_{scat}$ .

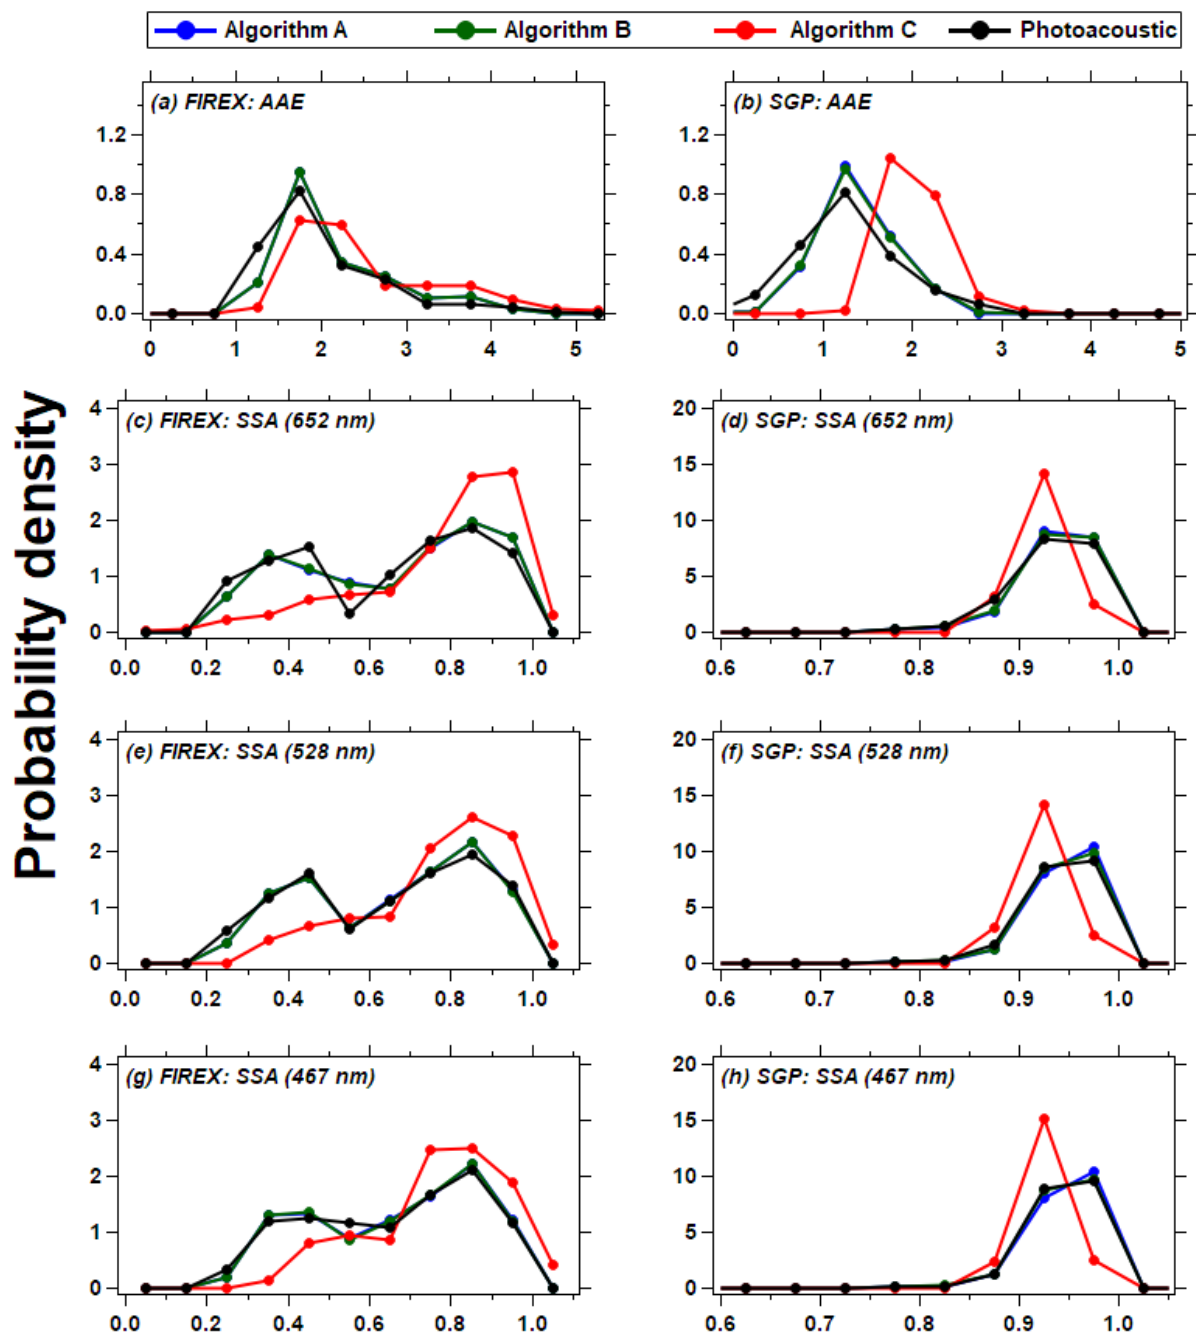

**Figure S11.** The probability density of AAE and SSA computed by the new algorithms (A, B, C) for the FIREX and SGP CLAP data. The curves of “Algorithm A” and “Algorithm B” overlap in some panels.

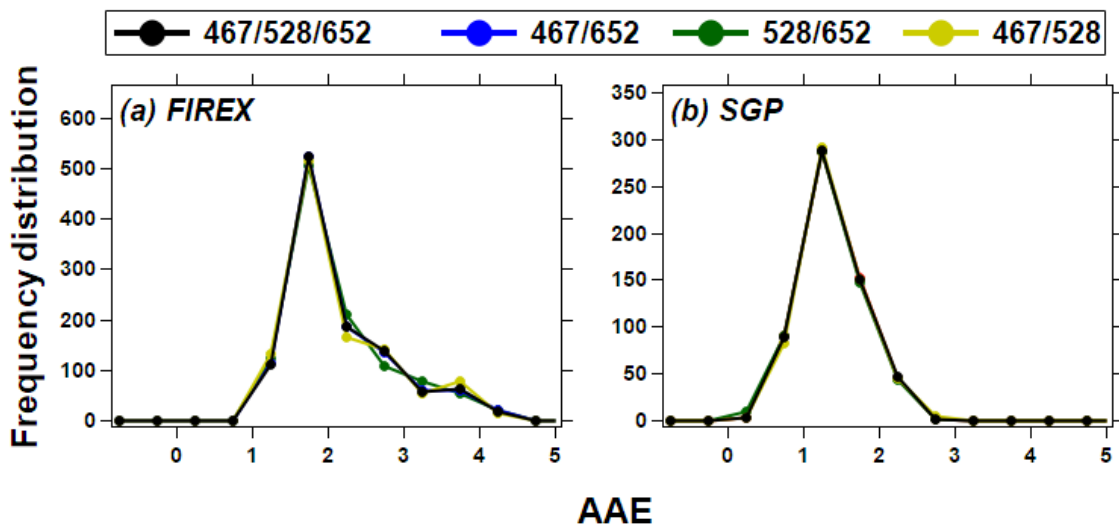

**Figure S12.** The frequency distribution of AAE calculated by different wavelength combinations (derived by “Algorithm A” in the present work).

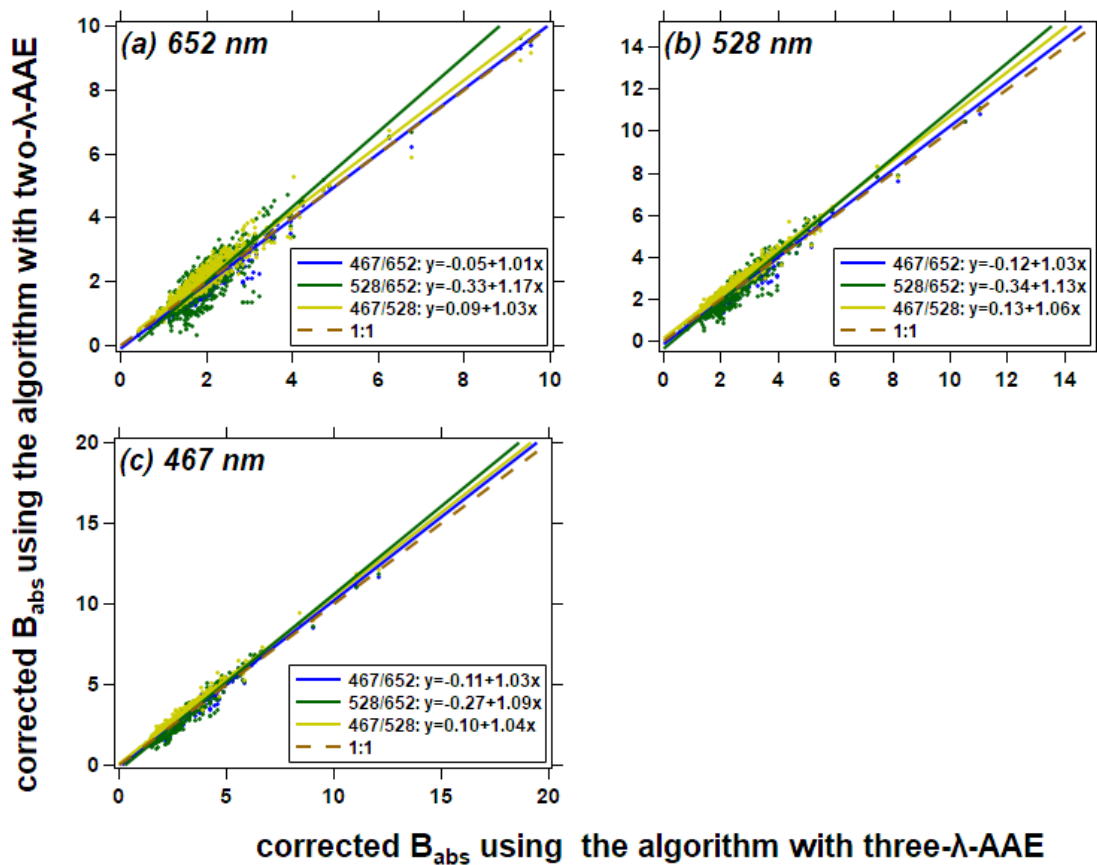

**Figure S13.** Inter-comparison of SGP-CLAP- $B_{\text{abs}}$  derived by “Algorithm A” with different calculation of AAE.

## REFERENCES

- Aiken, L.S., West, S.G., Reno, R.R., 1991. Multiple regression: Testing and interpreting interactions. Sage.
- Benoit, K., 2011. Linear regression models with logarithmic transformations. *London Sch. Econ. London* 22, 23–36.
- Creamer, D.B., Henyey, F., Schult, R., Wright, J., 1989. Improved linear representation of ocean surface waves. *J. Fluid Mech.* 205, 135–161.
- Dawson, J.F., Richter, A.W., 2006. Probing three-way interactions in moderated multiple regression: Development and application of a slope difference test. *J. Appl. Psychol.* 91, 917–926. <https://doi.org/10.1037/0021-9010.91.4.917>
- Lek, S., Delacoste, M., Baran, P., Dimopoulos, I., Lauga, J., Aulagnier, S., 1996. Application of neural networks to modelling nonlinear relationships in ecology. *Ecol. Modell.* 90, 39–52.
- Levenberg, K., 1944. A method for the solution of certain non-linear problems in least squares. *Q. Appl. Math.* 2, 164–168.
- Zedeck, S., 1971. Problems with the use of “moderator” variables. *Psychol. Bull.* 76, 295–310. <https://doi.org/10.1037/h0031543>
